1 **Title:** Synteny-based genome assembly for 16 species of *Heliconius* butterflies, and an assessment of  
2 structural variation across the genus

3

4 **Running Title:**

5 Synteny and structural genomics in *Heliconius*

6

7 **Authors:** Fernando A. Seixas<sup>1\*</sup>, Nathaniel B. Edelman<sup>1,2</sup>, James Mallet<sup>1\*</sup>

8 <sup>1</sup>Department of Organismic and Evolutionary Biology, Harvard University, Cambridge, MA 02138, USA

9 <sup>2</sup>Yale Institute for Biospheric Studies, 170 Whitney Avenue, RM 213A New Haven, CT 06511 USA

10 **Corresponding authors:** fernando\_seixas@g.harvard.edu, jmallet@oeb.harvard.edu

11

12 **Abstract**

13 *Heliconius* butterflies (Lepidoptera: Nymphalidae) are a group of 48 neotropical species widely studied in  
14 evolutionary research. Despite the wealth of genomic data generated in past years, chromosomal level  
15 genome assemblies currently exist for only two species, *Heliconius melpomene* and *H. erato*, each a  
16 representative of one of the two major clades of the genus. Here, we use these reference genomes to  
17 improve the contiguity of previously published draft genome assemblies of 16 *Heliconius* species. Using  
18 a reference-assisted scaffolding approach, we place and order the scaffolds of these genomes onto  
19 chromosomes, resulting in 95.7-99.9% of their genomes anchored to chromosomes. Genome sizes are  
20 somewhat variable among species (270-422 Mb) and in one small group of species (*H. hecale*, *H.*  
21 *elevatus* and *H. pardalinus*) differences in genome size are mainly driven by a few restricted repetitive  
22 regions. Genes within these repeat regions show an increase in exon copy number, an absence of internal  
23 stop codons, evidence of constraint on non-synonymous changes, and increased expression, all of which

24 suggest that the extra copies are functional. Finally, we conducted a systematic search for inversions and  
25 identified five moderately large inversions fixed between the two major *Heliconius* clades. We infer that  
26 one of these inversions was transferred by introgression between the lineages leading to the *erato/sara*  
27 and *burneyi/doris* clades. These reference-guided assemblies represent a major improvement in  
28 *Heliconius* genomic resources that should aid further genetic and evolutionary studies in this genus.

29 **Keywords:** *Heliconius*, Genome Assembly, Structural Variation, Inversions, Copy Number Variation

30

31

32

33

34

35

36

37

38

39

40

41

42

43

44

45

## 46 **Introduction**

47 Advances in sequencing technology have revolutionized the field of evolutionary biology. Generating  
48 short-read genomic datasets is now common practice, enabling investigation of fundamental evolutionary  
49 processes including the genetic basis of adaptive traits, dynamics of selection on particular alleles, and  
50 demographic histories of populations. In order to exploit the power of low-cost short-read data, one must  
51 usually align reads to a reference genome.

52 The availability of high-quality reference genomes can determine the breadth and power of comparative  
53 and population genomic analyses in evolutionary studies. For instance, placing genome scaffolds on  
54 chromosomes allows one to contrast patterns between autosomes and sex chromosomes which has been  
55 important for understanding speciation (Coyne and Orr 1989; Coyne 2018; Prowell 1998; Masly and  
56 Presgraves 2007; Fontaine et al. 2015; Ellegren et al. 2012; Seixas et al. 2018; Martin et al. 2019).

57 Anchoring scaffolds to chromosomes can also enable discovery of divergence and gene flow along  
58 chromosomes and how it is modified by recombination rate variation (Schumer et al. 2018; Martin et al.  
59 2019). Furthermore, chromosome-level assemblies have been shown to greatly improve the power and  
60 resolution of genome-wide association and QTL studies (Benevenuto et al. 2019; Markelz et al. 2017).

61 However, high-quality, chromosome-level, contiguous reference genome assemblies are often limited to  
62 one or a few species in many groups of taxa, especially in non-model organisms. This is partly due to the  
63 fact that generating near-complete chromosome-level assemblies normally requires integrating a mixture  
64 of high fidelity short-read sequencing data (today typically Illumina), and more costly long-read  
65 sequencing data (such as PacBio or Nanopore), genetic linkage mapping, optical (restriction site)  
66 mapping, and/or chromatin interaction frequency data (Hi-C) (Rice and Green 2019; Ghurye and Pop  
67 2019; Yang et al. 2020; Wei et al. 2020; Deschamps et al. 2018; Yu et al. 2019). These methods can be  
68 prohibitively expensive and time consuming, especially for entire clades.

69 With 48 described species, *Heliconius* butterflies are a prime example of an adaptive radiation where  
70 multiple chromosome-level reference assemblies could improve evolutionary analyses. Currently,

71 published high-contiguity genome assemblies (hereafter, reference genomes) exist for only two species –  
72 *H. melpomene* (Davey et al. 2017) and *H. erato* (*H. erato lativitta* – Lewis et al., 2016; *H. erato*  
73 *demophoon* – Van Belleghem et al., 2017). While these chromosome-level reference assemblies are  
74 essential tools for genomic studies in *Heliconius*, each has limitations. At 275 Mb, *H. melpomene* has the  
75 smallest *Heliconius* genome assembled to date (Edelman et al. 2019). Mapping short-read sequencing  
76 data from other species with larger genomes to this reference genome is likely to result both in the loss of  
77 information, due to loss of ancestral orthologous sequence in the *H. melpomene* genome, and spurious  
78 read mapping to similar but non-orthologous regions. In contrast, the two *H. erato* reference genomes  
79 (383 and 418 Mb) are among the largest *Heliconius* genomes assembled to date. However, while these  
80 might be appropriate for studies focusing on closely related species (e.g. species within the *erato* clade),  
81 mapping accuracy decreases in more divergent species (Prüfer et al. 2010) and better results are obtained  
82 when mapping to closer reference genomes (Gopalakrishnan et al. 2017). Also, as we move from  
83 comparative (e.g. phylogenomic) towards more functional genetics studies (Lewis et al. 2016; Lewis and  
84 Reed 2019; Pinharanda et al. 2019), this genus could benefit greatly from higher-quality species-specific  
85 genomic resources.

86 Recently, *de novo* draft genomes of 16 *Heliconius* species (Supplemental Table S1) have been assembled  
87 (Edelman et al. 2019). These genomes were generated from Illumina PCR-free libraries sequenced at  
88 deep coverage (at least 60X coverage) using paired-end 250-bp reads on the Illumina Hi-Seq 2500 and  
89 assembled using *w2rap* (Clavijo et al. 2017), an extension of the DISCOVAR *de novo* genome assembly  
90 method (<https://software.broadinstitute.org/software/discovar/blog/>; Love et al. 2016; Weisenfeld et al.  
91 2014). This strategy results in high-quality genomes in terms of read accuracy, contiguity within  
92 scaffolds, and genome completeness (87.5-97.3% complete single copy core BUSCO genes present;  
93 Edelman et al. 2019). Nonetheless, because these assemblies (hereafter, *w2rap* assemblies) used only  
94 short-read data, they were considerably more fragmented (scaffold N50 = 23-106 kb) than the *Heliconius*  
95 reference genomes. Furthermore, scaffolds were not assigned to chromosomes.

96 A cost-effective approach for improving the contiguity of existing draft genomes is to use synteny-based  
97 methods that identify potentially adjacent scaffolds from multi-species alignments. Such methods are  
98 particularly efficient if high-quality reference genome assemblies of closely related species are available,  
99 and especially if there is high synteny between the genomes of the draft and reference assemblies (Alonge  
100 et al. 2019), as in *Heliconius*. While a limited number of genomic rearrangements have been identified in  
101 *Heliconius* (Davey et al. 2017; Jay et al. 2018; Edelman et al. 2019; Meier et al. 2020), even species as  
102 divergent as *H. melpomene* and *H. erato*, which last shared a common ancestor over 10 million years ago,  
103 remain highly collinear (Davey et al. 2017). Synteny-based assembly should thus be especially effective  
104 within this genus.

105 Here, we exploit the chromosome-mapped assemblies of the *H. melpomene melpomene* and *H. erato*  
106 *demophoon* reference genomes to guide improvement of contiguity of the *w2rap* draft genome assemblies  
107 of 16 *Heliconius* species. The *w2rap* scaffolds were ordered, oriented and anchored onto chromosomes,  
108 resulting in a level of completeness of the scaffolded *w2rap* assemblies similar to that of reference  
109 genomes. A potential weakness of our synteny-based assembly method is that it can miss structural  
110 variation among species where it occurs. However, we use these scaffolded *w2rap* assemblies (hereafter,  
111 reference-guided assemblies) to identify clade-specific local genomic expansions due to local duplications  
112 with potentially functional consequences. To estimate how much structural variation we might be  
113 missing, we also carry out a systematic search for candidate inversions in the genus using the original  
114 *w2rap* scaffolds to detect break-points, and demonstrate that the results can be used to investigate  
115 phylogenetic uncertainty and gene flow deep in the tree of *Heliconius* species.

116

## 117 **Results**

### 118 *Reference-guided genome assemblies and annotation*

119 Alternative haplotype scaffolds in the *w2rap* assemblies were first merged using HaploMerger2, reducing  
120 the numbers of scaffolds by 31.3-64.6% and total assembly length by 3.4-25.9% (Supplemental Table  
121 S2). These haplotype-merged scaffolds were then assembled using our reference guided approach.  
122 Standard metrics for the resulting assemblies can be found in Supplemental Table S2. Contiguity of all  
123 assemblies was considerably improved, with a reduction in the numbers of scaffolds to 0.9-16.8% of the  
124 original *w2rap* assemblies (Supplemental Table S2; Supplementary Figs. S1-2). N50 length values were  
125 14.2-20.0 Mb when using the *H. melpomene* genome as reference (the N50 of the *H. melpomene*  
126 reference genome is *ca.* 14.3 Mb) and 7.1-11.5 Mb when using the *H. erato demophoon* genome (*H. erato*  
127 *demophoon* reference genome N50 is *ca.* 10.7Mb). In general, scaffolds in the reference anchored to  
128 chromosomes have a single corresponding scaffold in each of our reference-guided assemblies  
129 (Supplemental Figs. S3-S36). Overall, 94.5-99.5% and 91.6-99.7% of bases in each reference-guided  
130 assembly were anchored to chromosomes using the *H. melpomene* and *H. erato* references, respectively  
131 (Supplemental Table S2; Figure 1B; Supplemental Fig. S37). For each species, the proportion of  
132 reference-guided assembly length anchored to chromosomes was higher in assemblies guided by the  
133 genome of the phylogenetically closest species, *H. doris* being the only exception. This species is distant  
134 from both reference genomes, but has been inferred to be phylogenetically closer to *H. melpomene*  
135 (Edelman et al., 2019; Kozak et al., 2018; Kozak et al., 2015). However, it shows a 0.2% higher  
136 proportion of the assembly length included in scaffolds anchored to chromosomes using *H. erato*  
137 *demophoon* as the reference, likely because the larger genome of *H. erato* contains ancestral sequence  
138 that was lost by the smaller *H. melpomene* genome but retained in the early branching *H. doris*.

139 Genome sizes, considering only scaffolds anchored to chromosomes, varied between *ca.* 270-422 Mb  
140 (Figure 1C; Supplemental Table S2). Phylogeny is a predictor of genome size: species within the  
141 *erato/sara* clade have larger genomes (327-422 Mb) than species in the *melpomene/silvaniform* group  
142 (270-325 Mb; Figure 1C), while genome sizes of *H. burneyi* and *H. doris* (334 and 371 Mb, respectively)  
143 are more typical of those of the *erato/sara* group. The genome size of the *H. melpomene* reference-guided

144 assembly (270 Mb; 271 Mb including all scaffolds) is similar to that of the reference assembly (273 Mb;  
145 275 Mb total; Davey et al., 2017), but both are smaller than estimates based on flow cytometry (292 Mb  
146 +/- 2.4 Mb; Jiggins et al., 2005). The genome size of the *H. erato demophoon* reference-guided assembly  
147 (388 Mb; 391 Mb total) is a little larger than that of the reference assembly (383 Mb; Van Belleghem et  
148 al. 2017) but both are smaller than flow cytometry estimates (396-397 Mb, misnamed as *H. e. petiverana*;  
149 Tobler et al., 2005). Despite the difference in genome sizes of the reference genome used to guide  
150 scaffolding, genome sizes of our assemblies (considering only scaffolds anchored to chromosomes) did  
151 not depend strongly on which reference genome was used (Spearman's Rank correlation test  $\rho = 0.99$ ;  $P$   
152  $\ll 0.01$ ; linear regression slope=0.81; Figure 1C). Likewise, individual chromosome lengths of the  
153 species assemblies scaffolded using the two different references differed little and were highly correlated  
154 (Spearman's Rank correlation coefficient,  $\rho = 0.94-0.99$ ;  $P \ll 0.01$ ; linear regression slope = 0.80-1.05;  
155 Supplemental Fig. S38; Supplemental Table S3).

156 Assembly completeness was evaluated by the presence of core arthropod genes in BUSCO. The  
157 proportion of detected orthologs varied between 98.6 and 99.6%, values similar to those reported by  
158 Edelman et al. (2019) for the original *w2rap* genomes (Supplemental Fig. S39; Supplemental Table S4).  
159 There are however improvements (1-10% increase) in terms of the percentage of complete single copy  
160 BUSCOs and a reduction in complete duplicated, fragmented and missing BUSCOs. These  
161 improvements are likely a consequence of the increased contiguity and decreased scaffold redundancy  
162 (due to the collapsing of alternative haplotype scaffolds) in the reference-guided assemblies, which allows  
163 for better mapping of the core genes.

164 Gene annotation of *H. melpomene* and *H. erato demophoon* reference genomes was mapped onto the  
165 reference-guided assemblies using the annotation lift-over tool Liftoff (Shumate and Salzberg 2020). We  
166 considered only transcripts with ORFs (i.e. start and stop codon, no frame-shift mutation and no internal  
167 stop codons) as successful mappings. Out of the 21,656 transcripts from 20,096 *H. melpomene* annotated  
168 genes and 20,118 transcripts from 13,676 *H. erato demophoon* annotated genes, we were able to

169 successfully map 5,817-14,838 *H. melpomene* genes (6,217-16,007 transcripts) and 4,530-9,780 *H. erato*  
 170 *demophoon* genes (6,139-14,472 transcripts) - Supplemental Table S5. The success of the gene annotation  
 171 lift-over approach decreased with phylogenetic distance to the reference. While some of the genes that  
 172 were not successfully lifted-over could potentially represent mis-annotations in the reference, this could  
 173 also reflect differences in the structure of these genes or differences in gene composition between species.  
 174 In fact, Liftoff is designed to map annotations between assemblies of the same or closely-related species  
 175 and assumes gene structure is conserved between target and reference assemblies. Species-specific *de*-  
 176 *novo* gene annotation using transcriptome data would be needed to obtain a more comprehensive  
 177 annotation for all species.  
 178

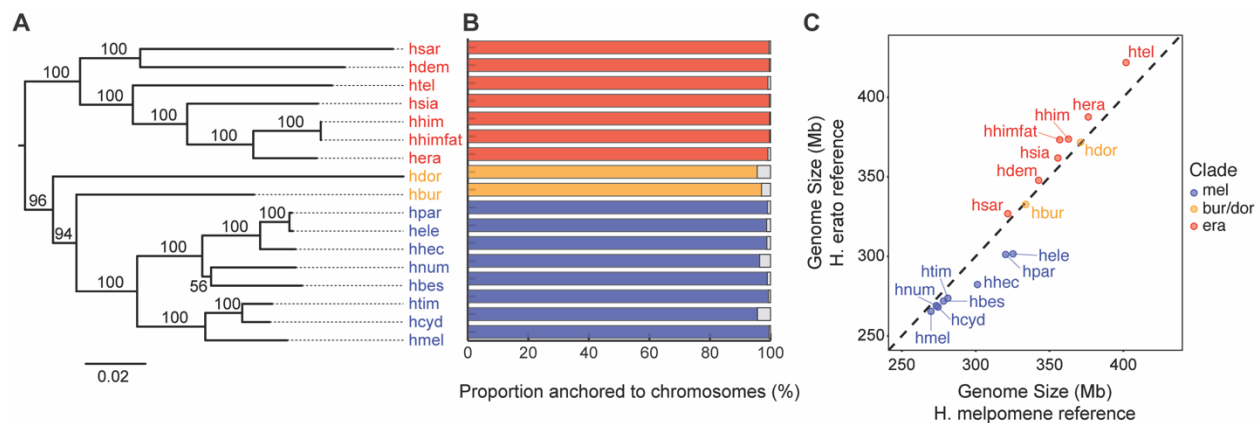

179  
 180 **Figure 1 – Reference-guided assemblies.** **A** – Maximum-likelihood tree from whole mitochondrial genomes assembled here.  
 181 Bootstrap values are shown next to the branches. The tree was rooted using the *E. tales* mitochondrial genome. **B** – Proportion of  
 182 the reference-scaffolded assemblies length anchored to chromosomes. The results are shown for the reference-guided assemblies  
 183 mapped to the closest reference (either *H. melpomene* or *H. erato demophoon*). For a complete report of the results see  
 184 Supplemental Fig. S37. **C** – Reference-scaffolded assemblies nuclear genome sizes using either *H. melpomene* (x-axis) or *H.*  
 185 *erato demophoon* (y-axis) as the reference. The dashed line represents the expectation if there was a 1:1 correspondence. In all  
 186 panels, subclade memberships are represented by different colours – *melpomene/silvaniform* (blue), *burneyi+doris* (yellow),  
 187 *erato/sara* (red). Species codes for all the new reference-guided assemblies are as follows: hmel – *H. melpomene*; hcyd – *H.*  
 188 *cydno*; htim – *H. timareta*; hbes – *H. besckei*; hnum – *H. numata*; hhec – *H. hecale*; hele – *H. elevatus*; hpar – *H. pardalinus*; hbur



189 – *H. burneyi*; hdor – *H. doris*; hera – *H. erato*; hhimfat – *H. himera*; hhim – *H. himera*; hsia – *H. hecalesia*; htel – *H. telesiphe*;  
190 hdem – *H. demeter*; hsar – *H. sara*.

191

## 192 ***Whole mitochondrial genome assemblies***

193 The *de novo* assembly of *Heliconius* mitochondrial genomes allowed the recovery of partially complete  
194 mitochondrial sequences (*ca.* 15-kb, typical of *Heliconius*) for all 16 species, including part of the  
195 mitochondrial DNA control region. A genealogy based on these mitochondrial genomes (Figure 1A) did  
196 not differ from that for the mitochondrial genomes assembled using reference-aided approaches (Kozak et  
197 al. 2015; Massardo et al. 2020), thereby validating our *de novo* approach.

198

## 199 ***Improved mapping efficiency using the reference-guided assemblies***

200 Mapping the original *w2rap* Illumina short read sequence data to the reference-guided genome assemblies  
201 of their own species resulted in 0.45-12.77% more mapped reads and 0.60-40.77% more properly paired  
202 reads than when mapping to the closest reference genome (Supplemental Table S6). These mappings also  
203 show an increase of the depth of coverage (1.02-2.29 times the coverage obtained when mapped to the  
204 closest reference; Supplemental Table S6), which is also more uniform along chromosomes  
205 (Supplemental Figs. S40-S41). The largest increases in depth of coverage were observed for *H. burneyi*  
206 and *H. doris*, which are the two sequenced *Heliconius* species phylogenetically most distant to either  
207 reference genome. Increases in depth of coverage tend to be larger in species in the *erato/sara* clade (1.06  
208 to 1.97 times more coverage) than in species in the *melpomene/silvaniform* clade (1.02 to 1.35 times more  
209 coverage). This is expected since species sampled within the *erato/sara* clade were typically more  
210 divergent from *H. erato* than species in the *melpomene/silvaniform* group are from *H. melpomene*.  
211 Importantly, these results show how studies focusing on *Heliconius* species with deeper divergence to  
212 both *H. melpomene* and *H. erato* will benefit from mapping re-sequence data to the reference-guided

213 assemblies generated here. Also, the greater uniformity of coverage along chromosomes when mapping  
214 reads to the reference-guided assemblies suggests that they should better capture fine-scale structural  
215 variation. This likely reflects the ability of the high sequencing fidelity of the original *w2rap* assemblies  
216 to resolve short imperfect repeats (< 500 bp long) (Love et al. 2016; Edelman et al. 2019) that differ  
217 between species.

218

### 219 ***Genome expansions and gene duplications***

220 Although genome sizes vary among *Heliconius* species, the relative but not absolute sizes of  
221 chromosomes were generally conserved (Figure 2A, Supplemental Fig. S42). The three closely related  
222 species with the largest genomes in the *melpomene*/silvaniform group (*H. hecale*, *H. elevatus* and *H.*  
223 *pardalinus*) are exceptions. Upon closer inspection, the variation in chromosome size in these three  
224 species is particularly accentuated on chromosome 9 (Figure 2A; Supplemental Fig. S42). Alignment of  
225 reference-guided assemblies of these three species to the *H. melpomene* reference genome suggests that  
226 the increase in size of chromosome 9 mainly corresponds to a single genomic region in *H. melpomene*  
227 (Hmel209001o:5125000-5450000, Figure 2B). This region is *ca.* 325 kb long in *H. melpomene* but the  
228 scaffolds that map to it total over 10x as long (3.350-4.125 Mb) in the *hecale/elevatus/pardalinus* trio.

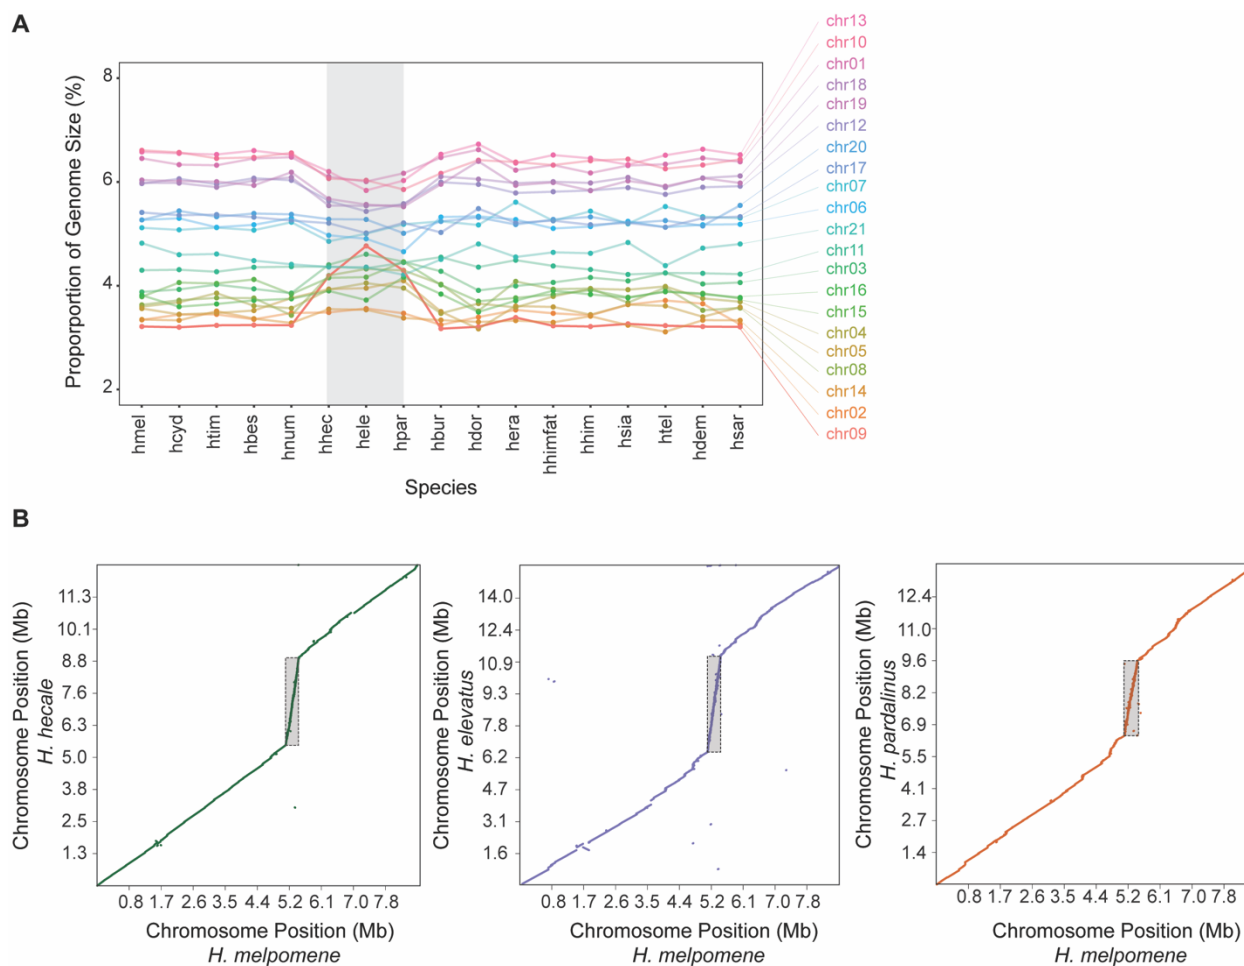

229

230 **Figure 2 – Chromosome size variation and local genomic expansions.** **A** – Chromosome sizes in proportion to the genome  
 231 size across the different species for the reference-guided assemblies mapped to the *H. melpomene* reference genome.  
 232 Chromosome relative sizes are generally similar across species, with the exception of *H. hecale*, *H. elevatus*, and *H. pardalinus*,  
 233 particularly chromosome 9. **B** – Genome to genome alignment showing the repeat region on chromosome 9 (highlighted by the  
 234 grey rectangles) in the species trio: *H. hecale*, *H. elevatus* and *H. pardalinus*.

235

236 We investigated whether other genomic regions also underwent an increase in size specifically in these  
 237 three species. There are four regions that show exceptionally high coverage in these three species (at least  
 238 5-fold local increase in the *hecale/elevatus/pardalinus* trio and less than 2-fold local increase in every  
 239 other species, in at least two consecutive 25 kb windows). These included the region on chromosome 9  
 240 discussed above and three other regions on chromosome 2 (Hmel202001o:4075000-4125000),

241 chromosome 4 (Hmel204001o:5650000-5875000), and chromosome 8 (Hmel208001o:3300000-3475000)  
242 (Supplemental Fig. S43, Supplemental Table S7). In contrast, mapping reads onto the reference-guided  
243 assemblies resulted in more uniform coverage in these regions (Supplemental Figs. S44-S47). This  
244 suggests the repeats are divergent enough so that they could be at least partially resolved in the *w2rap*  
245 assemblies.

246 All repeat regions harbor protein coding genes (Supplemental Table S7), as annotated in the *H.*  
247 *melpomene* reference genome, and thus structural variation in these regions could have resulted in gene  
248 copy number variations with potential functional consequences. To address this, we first estimated the  
249 copy number of each exon based both on i) the number of valid alignments of *H. melpomene* exon  
250 sequences onto the reference-guided assemblies and ii) the normalized mean per base coverage for each  
251 exon, mapping *H. hecale*, *H. elevatus* and *H. pardalinus* re-sequencing data to the *H. melpomene*  
252 reference. Copy number estimates based on number of exon sequence alignments are generally lower than  
253 estimates based on read coverage (Figure 2C; Supplemental Figs. S48-S50). Nevertheless, for both  
254 measures, exonic copy number is much larger in *hecale/elevatus/pardalinus* trio than in *H. melpomene*,  
255 suggesting duplications of the corresponding genes. It should also be noted that copy number is variable  
256 between exons of the same gene and, and while it can probably be attributed to different alignment  
257 efficiency due to variation in exons sequence length (Li 2018), it might also be due to partial duplications  
258 of some of these genes. However, given the fragmented nature of the *w2rap* genomes, we could not assess  
259 whether genes were wholly or partially duplicated, nor whether the duplications were translocated  
260 elsewhere in the genome or are located in the same region as in *H. melpomene*. Long read sequencing  
261 data would be required to resolve this.

262 These gene duplications could result in pseudogenes, in which case we might expect to find stop codons  
263 within exons and a relaxation of selection. In general, we find high exon copy numbers even after  
264 excluding exon copies with stop codons (10-14% exon copies have a stop codon; Supplemental Figs.  
265 S51-S54). Also, dN/dS estimates are overall close to zero, suggestive of purifying selection

266 (Supplemental Figs. S55-S58). RNA-Seq shows a significant correlation between gene copy number and  
 267 expression levels and that many of these genes have significantly higher expression in *H. pardalinus* than  
 268 in *H. melpomene* (Figure 2D). Together, these results suggest that many of the gene copies are functional  
 269 and that CNV at these genes resulted in altered gene dosage.  
 270

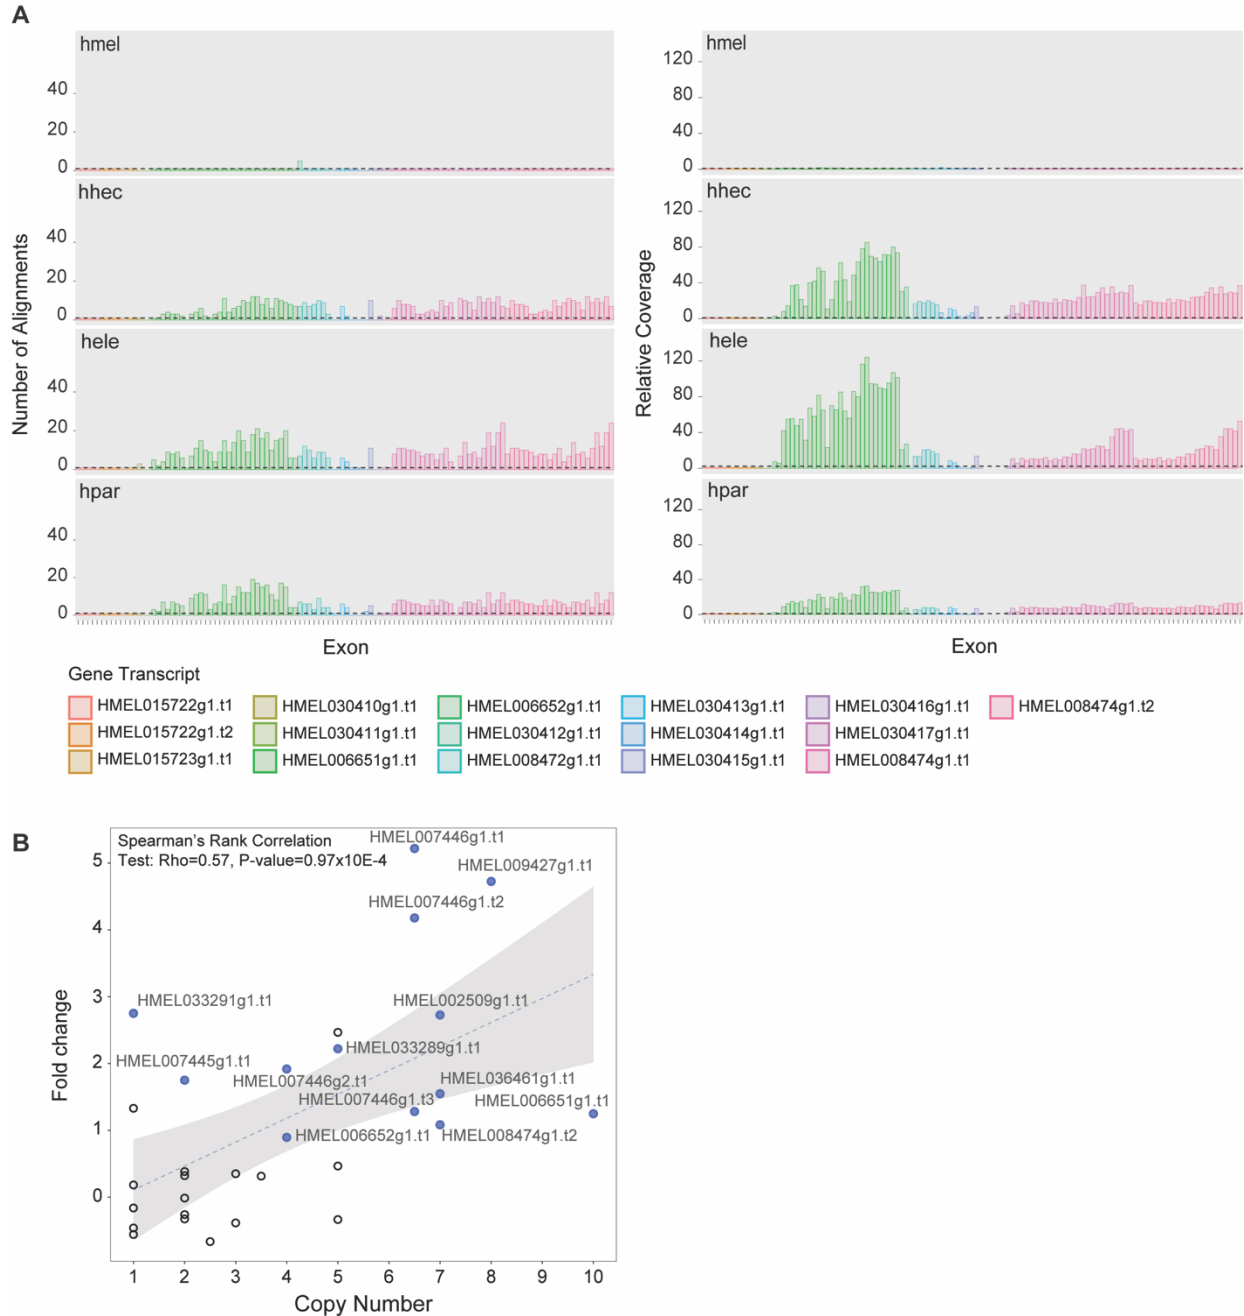

271

272 **Figure 3 - Copy number variation and increased expression levels of genes in the repeat region on chromosome 9. A –**  
273 Exon copy number variation for genes in the chromosome 9 repeat region. The number of alignments (left panel) and relative  
274 coverage (right panel) were used as proxies of copy number. Relative coverage was calculated by dividing exon coverage by the  
275 median genomic coverage, based on mappings to the *H. melpomene* reference. On the left panel, coloured bars depict the number  
276 of alignments to the expected chromosome. Dashed horizontal lines on both plots represent a copy number of one. *Our new H.*  
277 *melpomene* assembly was also included as a control. **B –** Fold change in expression level in *H. pardalinus* compared to *H.*  
278 *melpomene* (y-axis) as a function of *H. pardalinus* transcript copy number (x-axis). For each transcript, copy number was  
279 calculated as the median number of alignments across exons for the *H. pardalinus* sample. Full blue circles represent transcripts  
280 for which the levels of expression in *H. pardalinus* were significantly higher than in *H. melpomene*. The best fit linear model  
281 regression line and confidence intervals are depicted by the dashed line and grey band, respectively. Species codes are as in  
282 Figure 1.

283

### 284 ***Inversions fixed between the two Heliconius major clades***

285 Reference-guided assemblies will inevitably be ineffective at detecting inversions or translocated regions,  
286 so it seems important to quantify potential drawbacks of our approach. Previous studies showed that some  
287 regions of the genome with unusual phylogenomic patterns in the *erato/sara* clade were associated with  
288 inversions (Edelman et al. 2019). Here, we make a systematic search for small to medium sized inversion  
289 differences among *Heliconius* species, focusing on those 50 kb - 2 Mb long. At the broad scale, the  
290 genome structure of the reference-guided assemblies is constrained by the reference genome, so we  
291 returned to the *w2rap* scaffolds (after collapsing alternative haplotypes with HaploMerger2), mapping  
292 these to the *H. melpomene* and the *H. erato* reference genomes to infer inversion breakpoints. In total, and  
293 after filtering, we found 2560 and 3829 scaffolds for which one end aligns to the positive strand of the  
294 reference genome and the other end maps to the negative strand, using the *H. melpomene* and *H. erato*,  
295 respectively. Of these, 900 and 1786 support inversions 50 kb - 2 Mb long, yielding 345 and 741 unique  
296 candidate inversions across all species (mapping to *H. melpomene* and *H. erato demophaon*,  
297 respectively), supported by at least one scaffold per species, some of which were shared by multiple  
298 species (Supplemental Table S8).

299 Our systematic search confirmed previous findings of two independent but overlapping introgressed  
300 inversions around a color patterning locus on chromosome 15 (one shared by *H. sara*, *H. demeter*, *H.*  
301 *telesiphe* and *H. hecalesia* and the other shared by *H. pardalinus* and *H. numata*) and another inversion  
302 on chromosome 2 (shared by *H. erato* and *H. telesiphe*) (Edelman et al. 2019). In addition, we found five  
303 moderately large inversions, previously identified as inversion candidates based on alignments between  
304 *H. melpomene* and *H. erato* reference genomes (Davey et al. 2017), to be fixed between major branches  
305 of the *Heliconius* phylogeny (Figure 4A). Such shared inversions occur on chromosome 2 (Supplemental  
306 Fig. S59), chromosome 6 (Supplemental Fig. S60), chromosome 13 (Figure 2C; Supplemental Fig. S61)  
307 and the Z chromosome, chromosome 21 (Supplemental Fig. S62; Supplemental Table S9). The two  
308 inversions on chromosome 6 occur in tandem and are further supported by linkage maps in *H. melpomene*  
309 and *H. erato* (Davey et al. 2017).

310 The placement of *H. doris* and *H. burneyi* in the *Heliconius* phylogeny remains contentious. These two  
311 species have been inferred to be more closely related to the *melpomene*/silvaniform clade than to the  
312 *erato/sara* clade (see also the mitochondrial tree of Figure 1A), but node supports are relatively weak and  
313 the internal branches leading to *H. doris* and *H. burneyi* are short (Kozak et al. 2015). We here test  
314 whether homologous inversions can be used as a phylogenetic character to resolve their placement. Figure  
315 1A). Both *H. burneyi* and *H. doris* group with the *melpomene*/silvaniform group based on the orientation  
316 of three inversions on chromosomes 2 and 6, but with the *erato/sara* clade based on the of homologous  
317 inversions on chromosomes 13 and Z. These groupings are further confirmed based on maximum-  
318 likelihood (ML) phylogenetic analysis of the inversion regions using a subset of species (Figure 4B). The  
319 only exception is that *H. doris* and *H. burneyi* both group with *melpomene*/silvaniform species for the  
320 inversion on the Z chromosome in the ML phylogeny, rather than with *erato/sara* (Figure 4B), as might  
321 be expected solely based on presence/absence of the inversion. (Supplemental Fig. S61). This apparent  
322 contradiction can be reconciled if the *melpomene*/silvaniform clade is sister both to *H. doris* and to *H.*  
323 *burneyi*, but the Z chromosome inversion was derived in the *melpomene*/silvaniform ancestor after it split

324 from the *burneyi* and *doris* lineages. In this scenario, the sharing of the inversion between *burneyi/doris*  
325 and the *erato/sara clade* on chromosome 13 must be explained by secondary transfer *via* introgression,  
326 perhaps soon after the initial separation of the two major clades, or through incomplete lineage sorting of  
327 an inversion polymorphism at the base of *Heliconius*. Previously, reticulation involving *H. burneyi* and *H.*  
328 *doris* and the *erato/sara* group had been hypothesized, but different phylogenomic methods gave different  
329 results (Kozak et al. 2018).

330 To test for introgression genome-wide, we used Patterson's *D*-statistic (Green et al. 2010; Durand et al.  
331 2011). Specifically, we calculated *D* for all possible topologies of the triplets (*H. erato* – *H. melpomene* –  
332 *H. doris*) and (*H. erato* – *H. melpomene* – *H. burneyi*), in each case using *Eueides tales* as an outgroup.  
333 For a given triplet of species, the minimum absolute whole genome Patterson's *D*-statistic should result  
334 for the topology that best describes the relationships between species. We found that this is the case when  
335 *H. erato* is the inner outgroup in both triplets, implying that *H. burneyi* and *H. doris* are more closely  
336 related to *H. melpomene*. Yet, Patterson's *D*-statistics are still significantly different from zero  
337 (Patterson's *D* = 0.037 and 0.060 for *H. doris* and *H. burneyi*, respectively) based on block-jackknifing,  
338 providing evidence of introgression among lineages leading to *H. burneyi*, *H. doris*, and *H. erato*. We  
339 also used an alternative branch length-based approach, QuIBL (Quantifying Introgression via Branch  
340 Lengths; Edelman et al. 2019), which further corroborated these results (Supplemental Table S10). To  
341 understand which specific genomic regions were shared by introgression between these species, we  
342 estimated the excess of shared derived mutations between *H. doris* and *H. burneyi* with either *H.*  
343 *melpomene* or *H. erato*, using the  $f_{dM}$  statistic (Malinsky et al. 2015). The  $f_{dM}$  estimates in windows  
344 overlapping the chromosome 13 inversion show a significant deviation from the genomic average, with  
345 an excess of shared variation between *H. erato* and both *H. doris* and *H. burneyi* (Figure 4D;  
346 Supplemental Fig. S63). Likewise, relative divergence between *H. erato* to both *H. burneyi* and *H. doris*  
347 is significantly reduced in the inversion region (Figure 4D; Supplemental Fig. S64). We also used QuIBL  
348 with the triplets (*H. erato* – *H. melpomene* – *H. doris*) and (*H. erato* – *H. melpomene* – *H. burneyi*) to



349 calculate the likelihood that the discordant phylogenies at the chromosome 13 inversion were due to  
350 introgression. For both triplets, the average internal branch of gene trees within the chromosome 13  
351 inversion is larger than the genome-wide average, corresponding to a 90.1% and 86.7% probability of  
352 introgression, respectively (Supplemental Fig. S65) We found no significant  $f_{dM}$  or relative divergence  
353 estimates for any of the other four inversions, including the Z chromosome inversion. These results  
354 strongly support the argument that the chromosome 13 inversion of *H. doris* and *H. burneyi* results from  
355 introgression from the common ancestor of the *erato/sara* clade.

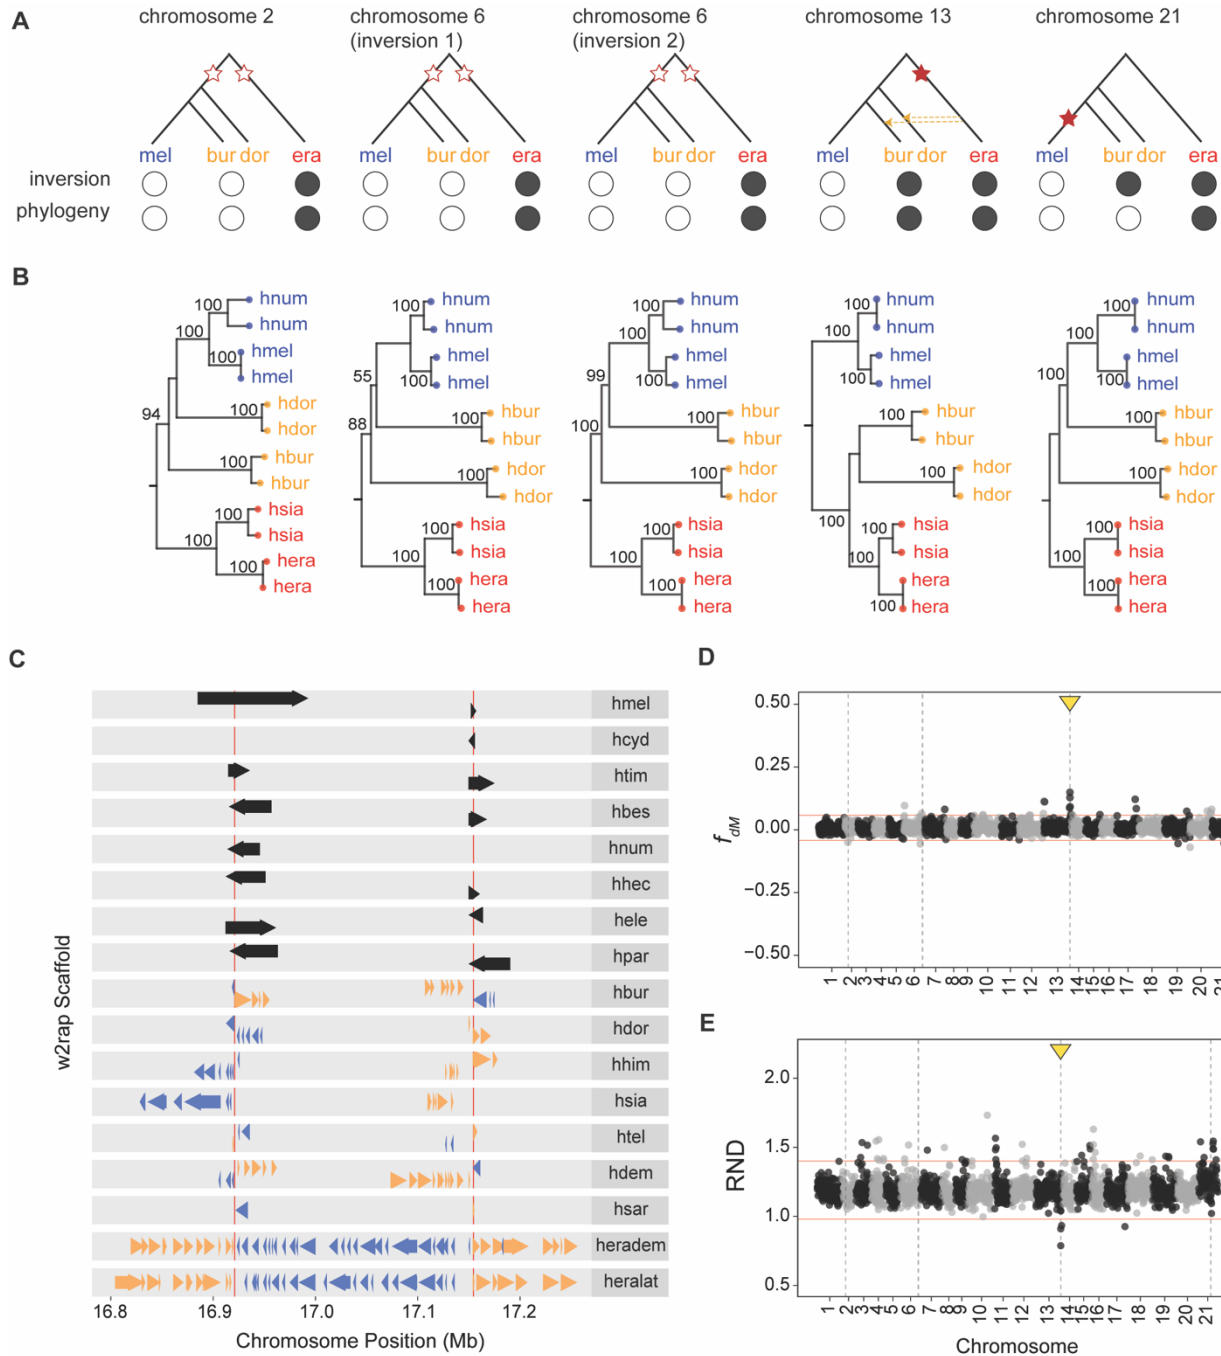

356

357 **Figure 4 – Large Inversions fixed between the *melpomene/silvaniform* and *erato/sara* clades.** **A** – Possible scenario for the  
 358 origin and sharing of the inversion. Stars represent inversions and the branch in which these likely took place. Empty stars are  
 359 used when the inversion is equally likely to have occurred in two branches. Introgression between branches are represented by  
 360 arrows, the direction of the arrow indicating directionality. Full and empty circles represent the orientation of the inversion and  
 361 the groupings based on the phylogeny. **B** – ML phylogenies of each major inversion estimated using IQ-TREE, based on  
 362 mapping of re-sequence data to the *H. melpomene* reference genome. **C** – Alignments of scaffolds to the *H. melpomene* reference genome

363 supporting the inversion on chromosome 13. Inversion breakpoints are depicted by the vertical red lines. Scaffold alignments are  
364 shown represented by the arrows, the direction and colour of the arrows representing whether the alignments are to the forward  
365 strand (blue rightwards arrows) or the reverse strand (yellow leftwards arrows). Black arrows represent alignments spanning the  
366 inversion breakpoints. **D,E**  $f_{dM}$  and relative node depth (RND) statistics along the genome. Both statistics were calculated in 25  
367 kb non-overlapping windows across the genome, based on mapping of re-sequencing data to the *H. melpomene*. Chromosomes  
368 are shown with alternating grey and black colours. The location of inversions is given by the dashed vertical lines while  
369 horizontal red lines represent  $\pm 3$  SD from the mean  $f_{dM}$  and RND values. Outlier windows overlapping the chromosome 13  
370 inversion are indicated by the yellow arrows. Positive  $f_{dM}$  values (and lowered RND) indicate an excess of shared variation  
371 between *H. burneyi* with *H. erato* and negative values of  $f_{dM}$  represent an excess of shared with *H. melpomene*. In this test, *H.*  
372 *melpomene* and *H. burneyi* were considered to be the ingroup species and *H. erato* the inner outgroup. Derived alleles were  
373 determined using *E. tales*. Species codes are as in Figure 1.

374

## 375 **Discussion**

### 376 ***Genome assembly improvements and limitations***

377 Here, we implement a purely *in silico* reference-guided scaffolding approach to improve draft genome  
378 assemblies of 16 species from across the genus *Heliconius*. The contiguity of our new assemblies is  
379 similar to that of the reference genomes. For instance, the *H. melpomene* reference genome assembly has  
380 38 scaffolds anchored to chromosomes (99.1% of the assembly length), and the reference-guided  
381 assemblies scaffolded based on this reference have 31-36 scaffolds anchored to chromosomes  
382 representing 83.8-99.1% of the total assembly. Similarly, the *H. erato* reference has 195 scaffolds  
383 anchored to chromosomes (100% of the assembly length), and the reference-guided assemblies scaffolded  
384 based on this reference have 94-168 scaffolds anchored to chromosomes representing 83.2-99.9% of the  
385 total assembly.

386 Our reference-guided assembly strategy assumes that the orientation and order of the new scaffolds in our  
387 genomes is the same as the reference. Clearly, it may not fully represent the structure of these genomes.  
388 While small genomic rearrangements spanned by the original scaffolds (i.e. rearrangements in relation to

389 the reference present within *w2rap* scaffolds) are recovered in our reference-guided assemblies, larger  
390 genomic rearrangements relative to the reference not spanned by a single *w2rap* scaffold can be missed.  
391 One such example is the case of the known *ca.* 400 kb inversion around a color pattern locus known from  
392 *H. numata* and *H. pardalinus* on chromosome 15 (Jay et al. 2018) which we do not recover in the  
393 reference-guided assemblies, in either species. This is also the case for the five large inversions we  
394 discovered that are fixed between the two *Heliconius* major clades, depending on the reference genome  
395 used to guide scaffolding. For instance, for species in the *melpomene*/silvaniform group, all reference-  
396 guided assemblies mapped to the *H. melpomene* reference have the correct orientation for all five  
397 inversions, but not when mapped to the *H. erato* reference. The same logic applies for species in the  
398 *erato/sara* group, when mapped to different references. For *H. burneyi* and *H. doris* however, neither of  
399 the two alternative reference-guided assemblies recovers the correct orientation of all five inversions,  
400 since these two species share the same orientation as *H. melpomene* for the inversions on chromosome 2  
401 and 6, but not for chromosomes 13 and 21 (for which they have the same orientation as *H. erato*). Long-  
402 read sequence data and/or linkage mapping could better resolve the genome structure of species-specific  
403 assemblies. Nevertheless, our reference-guided assemblies represent a major improvement over mapping  
404 short read data directly to existing reference genomes, and researchers that use these and other reference-  
405 guided assemblies for this purpose will see marked improvement in their data quality.

406 Mapping the original *w2rap* Illumina reads back to the reference-guided assembly of their own species  
407 resulted in more than doubling of the median genomic coverage in some species and in a more uniform  
408 depth of coverage along the genome than when mapping to the closest reference genome. Mapping  
409 efficiency improves in all species studied here (Supplemental Table S6), but we see the greatest benefits  
410 in *H. burneyi* and *H. doris*, the two *Heliconius* species studied here that are most divergent from either  
411 reference genome assembly. In these two species, the proportion of properly mapped reads increases from  
412 53.6% and 49.9% (for *H. burneyi* and *H. doris*, respectively) when mapped to the *H. melpomene*  
413 reference genome, to 90.7% and 90.6% when mapped to their own reference-guided assembly. In another

414 study (Rosser et al., in preparation), a linkage map produced from backcrosses of F1 male hybrids,  
415 between *H. pardalinus butleri* and *H. p. sergestus*, to the parental *H. p. butleri* population contained ca.  
416 29% more markers when RADseq data was mapped to the new *H. pardalinus* reference-guided assembly  
417 than to the *H. melpomene* reference. The use of reference-guided assemblies of the closest species thus  
418 greatly improves the efficiency of mapping resequencing data over mapping to the currently available  
419 reference genomes.

420 The more uniform depth of coverage when mapping to reference-guided assemblies also leads to  
421 improvements in discovery of species-specific genomic variation and in resolving imperfect repeat  
422 regions. Indeed, given variation in genome sizes among *Heliconius* species (275-418 Mb), the new  
423 genomes are helpful in mapping variation that is otherwise lost or mapped to similar but non-orthologous  
424 regions of more divergent reference genomes. Variations in depth of coverage along the genome, if not  
425 properly filtered, could lead to biased estimates of diversity and divergence. For example, partially  
426 divergent repeats mapping to the same region in the reference genome (resulting in unusually high  
427 coverage) could inflate local estimates of diversity and thus be spuriously implicated as important sites  
428 for species divergence. This is especially likely in studies focusing on *Heliconius* species with larger  
429 genomes when mapping reads to the *H. melpomene* reference, the smallest genome assembled here. On  
430 the other hand, if regions with abnormal coverage are filtered out, information could be lost by discarding  
431 genomic regions with potentially relevant biological signals. For example, highly divergent regions may  
432 result in abnormally low coverage, even though such regions could be important for diversification of the  
433 group.

434 Overall, our reference-guided assemblies extend the number of applications for which these genomes can  
435 be used. By ordering, orienting and anchoring scaffolds onto chromosomes, the new reference-guided  
436 assemblies enable improved chromosome-scale analyses and genome scans.

437

438 ***Prevalence of structural variants in Heliconius butterflies***

439 Chromosomal rearrangements can play a major role in adaptation and speciation (Wellenreuther and  
440 Bernatchez 2018; Feulner and De-Kayne 2017). By reducing recombination, inversions can facilitate the  
441 build-up of associations between loci involved in traits responsible for reproductive isolation, and thus  
442 could play a role in establishing or reinforcing species barriers (Noor et al. 2001). Inversions can also be  
443 favored by selection by maintaining adaptive combinations of locally adapted alleles (Todesco et al.  
444 2020; Faria et al. 2019; Christmas et al. 2019).

445 In *Heliconius*, a previous study focusing on two closely related species (*H. melpomene* and *H. cydno*)  
446 found no evidence for major inversions that might have aided speciation (Davey et al. 2017). Thus,  
447 *Heliconius* appeared to have low rates of chromosomal rearrangement, and selection without the help of  
448 chromosomal rearrangements was believed to maintain the differences between these two species. In  
449 another species, *H. numata*, the tandem inversion complex that forms the supergene locus *P* allows the  
450 maintenance of a multi-allele color pattern polymorphism of mimicry morphs (Joron et al. 2011). The  
451 first inversion in the tandem supergene was most likely transferred to *H. numata* via introgression from  
452 *H. pardalinus* (Jay et al. 2018). An independently derived inversion has since been found for the same  
453 colour pattern determination region in four species in the *erato/sara* clade (*H. telesiphe*, *H. hecalesia*, *H.*  
454 *demeter* and *H. sara*). This inversion was also inferred to have been shared via introgression, this time  
455 between *H. telesiphe* and *H. sara* sub-clades (Edelman et al. 2019). In parallel hybrid zones of *H. erato*  
456 and *H. melpomene*, 14 and 19 polymorphic inversions were detected within each species, respectively.  
457 Most of these inversion polymorphisms did not differ across the hybrid zones of either species. The  
458 frequency of only one inversion on chromosome 2 (different to the inversion on chromosome 2 reported  
459 here) differed strongly across the hybrid zone between highland *H. e. notabilis* and lowland *H. e. lativitta*  
460 races, and may be associated with ecological adaptation to altitude (Meier et al. 2020).

461 In the 16 species studied here, we systematically searched for inversions. We found several candidates in  
462 all 16 species (17-61 and 40-126 inversions per species, compared with *H. melpomene* and *H. erato*,  
463 respectively), including some previously described (Davey et al. 2017; Jay et al. 2018; Edelman et al.

464 2019). However, the strategy we implemented to search for inversions, i.e. split alignment of *w2rap*  
465 scaffolds to forward and reverse strands of the reference genomes, is liable to false positives because  
466 small interspersed duplications and translocations (for example due to transposable element activity)  
467 might generate a similar signal. This is particularly likely in highly repetitive regions where we find many  
468 different, partially overlapping candidate inversions in many or all species (Supplemental Fig. S66). It is  
469 thus difficult to assess, solely based on these results, how pervasive inversions are among *Heliconius*  
470 species. While it is possible that inversions in this group occur more frequently than earlier studies  
471 indicated (Heliconius Genome Consortium 2012; Davey et al. 2017), long-read or linked-read  
472 sequencing, preferably with a larger set of individuals per species, will ultimately be needed to answer  
473 this question.

474 However, by focusing on phylogenetically informative inversions, we were able to verify five candidate  
475 inversions that occurred deep in the *Heliconius* phylogeny. We searched for inversions fixed between the  
476 *melpomene/silvaniform* and *erato/sara* groups. We are confident that these were correctly identified for  
477 two reasons. First, the inversions are supported in multiple species, with breakpoint coordinates consistent  
478 among species. Second, while a mis-assembly in the reference genome could generate a misleading signal  
479 of inversion, this is unlikely to happen for the same candidate inversion when mapping to two or more  
480 different genomes. All five of these inversions were supported in multiple species when mapping  
481 scaffolds to either reference genome, the orientation of the inversion being mirrored depending on the  
482 reference used. Furthermore, the inversion orientation shows a phylogenetic signal (fixed between clades)  
483 that is unexpected if due to mis-assembly in one of the reference genomes.

484 The most parsimonious scenario that explains both the orientation and the phylogenetic pattern, taking all  
485 five inversions into account, supports the hypothesis that *H. burneyi* and *H. doris* are more closely related  
486 to the *melpomene/silvaniform* group than to the *erato/sara* group (Figure 4), in line with previous studies  
487 (Edelman et al. 2019; Kozak et al. 2018). The relationships of the inversion on chromosome 13, which  
488 groups *H. burneyi*, *H. doris* and the *erato/sara* group, is then explained by introgression between the

489 ancestor of the latter group and both *H. burneyi* and *H. doris* (Supplemental Figs. S63-S65). Introgression  
490 almost certainly occurred from the *erato/sara* clade into *H. burneyi* and *H. doris*, since the relative  
491 divergence between *H. erato* and both *H. burneyi* and *H. doris* is reduced at the chromosome 13 inversion  
492 when compared to the rest of the genome (Figure 4E), but not between *H. erato* and *H. melpomene* as  
493 expected if introgression took place in the other direction (Supplemental Fig. S67). Interestingly, *H.*  
494 *burneyi* has been inferred to be on a separate branch from *H. doris*, although the two branches were  
495 connected by introgression (Kozak et al. 2015, 2018). This suggests that introgression of the chromosome  
496 13 inversion occurred twice. Either there were two separate introgression events from the *erato/sara*  
497 ancestor to *H. burneyi* and to *H. doris*, or the inversion first passed from the *erato/sara* ancestor to one of  
498 these two species which then passed it to the other. Altogether, and in line with previous studies (Edelman  
499 et al. 2019; Kozak et al. 2018), this inversion supports a hypothesis that hybridization and introgression  
500 among species occurred early in the radiation of *Heliconius*, as well as later, between more closely related  
501 species extant within each major subgroup. Alignment issues have previously made it hard to interpret  
502 evidence for introgression so deep in the phylogeny. Although we still do not know whether it has  
503 functional implications, our finding of transfer of this chromosome 13 inversion provides stronger support  
504 for introgression deeper in the Heliconiini tree than hitherto.

505 Species may also differ in gene copy number. Copy number can affect the phenotype by altering gene  
506 dosage, altering the protein sequence, or by creating paralogs that can diverge and gain new functions  
507 (Iskow et al. 2012). Copy number variation has been implicated in ecological adaptation – e.g. insecticide  
508 resistance in *Anopheles* mosquitoes (Lucas et al. 2019), climate adaptation in white spruce (Prunier et al.  
509 2017) and polar bears (Rinker et al. 2019), and resistance to malaria in humans (Leffler et al. 2017). Gene  
510 copy number may also be involved in reproductive barriers among species – e.g. hybrid lethality in  
511 *Mimulus* sympatric species (Zuellig and Sweigart 2018). Gene duplications within specific gene families  
512 in the branch leading to *Heliconius* have been linked to evolution of visual complexity, development,  
513 immunity (Heliconius Genome Consortium 2012) and female oviposition behavior (Briscoe et al. 2013).



514 Within the genus, gene copy number variation is plausibly associated with species divergence between *H.*  
515 *melpomene* and *H. cydno* (Pinharanda et al. 2017).

516 Here we show that the genomes of different *Heliconius* species vary in size, with each chromosome  
517 typically showing similar directional changes in size between species. Thus, genome expansions and  
518 reductions in size seem typically to involve all chromosomes, so that the relative sizes of chromosomes  
519 are conserved. Our study of the *Heliconius* butterfly radiation conforms, on a much more restricted  
520 phylogenetic scale, to the pattern of relative chromosome size across eukaryotes: across many orders of  
521 magnitude of genome size, relative chromosome sizes can be predicted based on chromosome number  
522 and are almost always between  $\sim 0.4x$  and  $\sim 1.9x$  the mean (Li et al. 2011).

523 We find that, in *Heliconius*, genomic expansion is at least partially driven by small genomic regions that  
524 became hotspots of repeat accumulation. Amplified regions tend to be conserved among closely related  
525 species and are more frequent towards chromosome ends (Supplemental Fig. S68). However, in a  
526 subclade of three closely related species (*H. hecale*, *H. elevatus* and *H. pardalinus*), we found four small  
527 genomic regions with highly aberrant increases in size and exon copy number compared to related  
528 species. These three are therefore exceptions to more or less orderly pattern across chromosomes in the  
529 rest of the genus. Our approach for detecting exceptional repeat regions relies on the *H. melpomene*  
530 genomic arrangement as a backbone. Hence, we do not know whether the additional copies we found  
531 were translocated to other regions of the genome of these three species, or whether they remained  
532 clustered as tandem copies at a single genomic location. By aligning the reference guided-assemblies to  
533 the *H. erato demophoon* reference, we found a signal of local expansion in chromosome 9 (Supplemental  
534 Figures S25-27) which would support that the repeats occur in tandem. However, we could not assess  
535 whether this was also the case for the repeat regions in the three other chromosomes. Transposable  
536 element activity is one possible mechanism responsible for these repeats (Bourque et al. 2018), and rapid  
537 divergent transposable element evolution has already been found among *Heliconius* species (Ray et al.  
538 2019). Hybridization could also spread variation in copy number among the species. *H. hecale*, *H.*

539 *elevatus* and *H. pardalinus* are sympatric in the Amazon where they are known to hybridize occasionally  
540 (Mallet et al. 2007; Rosser et al. 2019). We found significantly higher copy numbers in the Amazon than  
541 in extra-Amazonian populations of these species (Supplemental Fig. S69). The correlations of copy  
542 number among species in an area suggests that hybridization might indeed have been involved.

543 Genes within highly amplified regions had significantly higher expression levels in *H. pardalinus* than in  
544 *H. melpomene* (Figure 3B), which suggests that this gene copy variation could have functional  
545 significance. An examination of genes within these regions shows that orthologs of these genes in  
546 *Drosophila* are involved in important functions such as cytoskeletal processes and oogenesis (i.e.  
547 *Dhc64C*, *sima*, *shotgun*, and *capicua*; Supplemental Table S7). Evaluating how variation in these critical  
548 genes impacts phenotypes in *H. pardalinus*, *H. elevatus*, and *H. hecale* will advance our understanding of  
549 the role of copy number variation in evolution.

550 The full extent to which inversions and copy number variation play a role in the evolution of *Heliconius*  
551 butterflies remains to be examined. However, the current work suggests that the types of structural  
552 variation examined here could be relevant to diversification. The characterization of intra- and  
553 interspecific structural variation in this group could thus be an especially promising avenue for future  
554 studies particularly now that improvements in sequencing technology allow for more detailed, rigorous  
555 and cost-effective detection of structural variants (Wellenreuther et al. 2019; Logsdon et al. 2020).

556

## 557 **Methods**

### 558 ***Genome merging and scaffolding***

559 We used the draft genome scaffolder MEDUSA (Bosi et al. 2015) for reference-aided assembly of the  
560 existing DISCOVAR *de novo/w2rap* genomes (Edelman et al. 2019). MEDUSA relies on reference  
561 genomes from closely related species to determine the correct order and orientation of the draft genome  
562 scaffolds, assuming collinearity between reference and the lower contiguity genome. The *w2rap* genome

563 assemblies of 16 *Heliconius* species produced by Edelman et al. (2019) - Supplemental Table S1 - and  
564 high-quality reference genome assemblies of two *Heliconius* species - *H. melpomene* (Hmel2.5) and *H.*  
565 *erato demophoon* (*Heliconius\_erato\_demophoon\_v1*) - were downloaded from lepbase.org. Before the  
566 reference-scaffolding step, alternative haplotypes present in the *w2rap* assemblies were collapsed using  
567 the HaploMerger2 pipeline (version 20180603; Huang, Kang, & Xu, 2017). Repetitive elements and low  
568 complexity regions in the *w2rap* assemblies were first soft-masked using WindowMasker (Morgulis et al.  
569 2006) with default settings. A score matrix for LASTZ (used within HaploMerger) was generated for each  
570 *w2rap* assembly. This was done using the *lastz\_D\_Wrapper.pl* script with identity = 90 and splitting the  
571 *w2rap* assemblies into two sets of scaffolds (scaffolds greater or smaller than 150kb). HaploMerger2  
572 batch scripts A and B were then run using default settings. Finally, MEDUSA was used with default  
573 parameters to place and orient the *w2rap* assembly scaffolds based on either of the two reference  
574 genomes, placing 100 Ns between adjacent pairs of scaffolds mapping to the same reference  
575 chromosome/scaffold. This resulted in two scaffolded assemblies per species (one based on mapping to  
576 *H. melpomene* and another based on mapping to *H. erato demophoon* reference genomes).

577 Reference-guided assemblies were then re-aligned to the *H. melpomene* and *H. erato* reference genomes  
578 using the Mashmap aligner as implemented in D-GENIES v1.2.0 online tool (Cabanettes and Klopp  
579 2018) to assess collinearity. Scaffolds in the reference-guided assemblies aligning to reference assembly  
580 scaffolds anchored to chromosomes were renamed to reflect their association to chromosomes and order  
581 within chromosomes (as in the reference genomes). Also, when necessary, scaffold sequences were  
582 reverse-complemented to maintain the same orientation as in the reference.

583

#### 584 ***Mitochondrial genome assembly***

585 To assemble the mitochondrial genomes the 16 *Heliconius* species analyzed here, we first subsampled 1  
586 million read pairs from the original reads used to produce the *w2rap* assemblies. We then used ABySS  
587 2.0 (Jackman et al. 2017) to assemble the reads, using 5 different *k*-mer sizes (64, 80, 96, 112 and 128-bp)

588 and requiring a minimum mean unitig  $k$ -mer coverage of 10. All other parameters were left as default.  
589 Because of the higher number of mtDNA copies relative to nuclear DNA, resulting in higher mtDNA  
590 coverage, we were able to recover the mitochondrial genome as a single large contig (about the size of the  
591 complete mitogenome) while any nuclear contigs should be small. In *Heliconius*, the sizes of the  
592 mitogenomes sequenced so far are *ca.* 15,300-bp, thus only contigs larger than 15 kb were retained. These  
593 were then blasted to the NCBI Nucleotide collection (nr/nt) to confirm that they corresponded to the  
594 mitochondrial genome. Finally, for each species, only the largest contig (after removing Ns) was retained.  
595 The mitochondrial sequences were aligned using MAFFT v7.407 (Katoh and Standley 2013), with default  
596 parameters and a maximum-likelihood (ML) tree was estimated using IQ-TREE v1.6.10 (Nguyen et al.  
597 2015) – Figure 1A. Model selection was performed using ModelFinder (Kalyaanamoorthy et al. 2017)  
598 and branch support was assessed with 1000 ultra-fast bootstraps (Hoang et al. 2018), as implemented in  
599 IQ-TREE. We also used this approach to recover the mitogenome of *Eueides tales* (Accession number:  
600 SRS4612550) to use as an outgroup.

601

### 602 ***Scaffolded assemblies quality assessment***

603 Basic statistics (e.g. scaffold N50, cumulative length, proportion of missing sequence) of the reference-  
604 guided scaffolded genome assemblies were calculated using QUAST v5.0.2 (Gurevich et al. 2013).  
605 Assembly completeness was assessed using BUSCO\_V3 (Simão et al. 2015), which looks for the  
606 presence (complete, partial or duplicated) or absence (missing) of core arthropod genes (arthropoda-odb9  
607 dataset; [https://busco.ezlab.org/datasets/arthropoda\\_odb9.tar.gz](https://busco.ezlab.org/datasets/arthropoda_odb9.tar.gz)).

608

### 609 ***Gene annotation***

610 We used the Liftoff tool (Shumate and Salzberg 2020) to lift gene annotations from the reference  
611 genomes to the new reference-guided assemblies. We used either the *H. melpomene* (Hmel2.5.gff3) or *H.*

612 *erato demophoon* (*Heliconius\_erato\_v1\_-\_genes.gff.gz*) gene annotations (downloaded from  
613 [www.butterflygenome.org](http://www.butterflygenome.org) and [lepbase.org](http://lepbase.org), respectively), depending on the reference genome used for the  
614 scaffolding of the reference-guided assemblies. We ran Liftoff setting the maximum distance between two  
615 nodes to be either i) twice the distance between two nodes in the reference genome (i.e. distance scaling  
616 factor of 2) or ii) 20 kb distance between in the target, depending on which of these distances is greater. In  
617 order to improve mapping of exons at the ends of genes we extended gene sequences by 20% of the gene  
618 length, to include flanking sequences on each side (-flank 0.2). Given the *w2rap* scaffolds were ordered,  
619 oriented and anchored to chromosomes using the reference genomes as the backbone, and thus we know  
620 the association between scaffolds in the reference genomes and in the reference-guided assemblies, we  
621 have also enabled the option to first align genes chromosome by chromosome. All other parameters were  
622 set as default.

623

#### 624 ***Mapping and genotype calling of re-sequencing data***

625 Mapping efficiency of the original *w2rap* reads to the reference-guided assemblies was compared with  
626 mapping efficiency of the same reads to the reference genomes. Reads were first filtered for Illumina  
627 adapters using cutadapt v1.8.1 (Martin 2011) and then mapped to their respective reference-guided  
628 genome assemblies, the *H. melpomene* and *H. erato demophoon* reference genomes using BWA mem  
629 v0.7.15 (Li 2013), with default parameters and marking short split hits as secondary. Mapped reads were  
630 sorted and duplicate reads removed using sambamba v0.6.8 (Tarasov et al. 2015). Realignment around  
631 indels was performed with the Genome Analysis Toolkit (GATK) v3.8 RealignerTargetCreator and  
632 IndelRealigner modules (McKenna et al. 2010; DePristo et al. 2011), in order to reduce the number of  
633 indel miscalls. Mapping statistics and mean read depth were calculated in non-overlapping sliding  
634 windows of 25 kb using the *flagstat* and *depth* modules implemented in sambamba v0.6.8, respectively.  
635 Genotype calling was also performed for reads mapped to either of the two reference genomes and for  
636 each individual separately with bcftools v1.5 (Li et al. 2009) *mpileup* and *call* modules (Li 2011), using

637 the multiallelic-caller model (call -m) and requiring a minimum base and mapping qualities of 20.  
638 Genotypes were filtered using the bcftools *filter* module. Both invariant and variant sites were required to  
639 have a minimum quality score (QUAL) of 20. Furthermore, individual genotypes were filtered to have a  
640 depth of coverage (DP)  $\geq 8$  (except for the Z-chromosome of females for which the minimum required  
641 depth was 4) and genotype quality (GQ)  $\geq 20$ . All genotypes not fulfilling these requirements or within  
642 5-bp of an indel (--SnpGap) were recoded as missing data.

643

#### 644 ***Copy number variation and selection tests***

645 Copy number variation (CNV) of genes within repeat regions of interest was estimated using two  
646 different approaches. The first relies on mapping exonic sequences of genes annotated in the *H.*  
647 *melpomene* reference within regions of interest onto the reference-guided assemblies. The reference-  
648 guided assemblies were split back into the original scaffolds by breaking apart regions separated by 100  
649 consecutive Ns, in order to avoid potential mis-mappings over scaffold breakpoints. Exon sequences were  
650 mapped to these scaffolds using minimap2 v2.9 (Li 2018), with default settings (except that, as we were  
651 interested in repeats, we allowed a much larger threshold of up to 1000 different alignments). Only  
652 alignments for which  $\geq 50\%$  of the length of the exon was mapped were considered. Copy number of  
653 each exon was then estimated based on the number of alignments to these genomes. The second approach  
654 is based on read coverage of the original *w2rap* read data, mapped to the *H. melpomene* reference genome  
655 using BWA as described above. For each species, the mean read coverage within an exon (based on the  
656 coordinates of exons as annotated in *H. melpomene*) was calculated using the sambamba v0.6.8 ‘*depth*’  
657 module (Tarasov et al. 2015). Exon coverage was then normalized dividing by the median genomic  
658 coverage (calculated in non-overlapping windows of 25 kb along the genome as described above) to  
659 estimate copy number. This second approach was also used to estimate CNV in Amazon and extra-  
660 Amazonian populations of *H. hecale*, *H. elevatus* and *H. pardalinus* (Supplemental Table S11).

661 We further investigated whether CNV in specific genes resulted in potentially functional copies or  
662 pseudogenization by analyzing signals of codon-based selection and looking for the presence or absence  
663 of stop codons. For each gene we examine each exon independently since different exons can show  
664 different copy number. Sequences of the different putative copies were extracted from the reference-  
665 guided assemblies, based on the coordinates obtained by aligning the reference *H. melpomene* exon  
666 sequences to the reference-guided assemblies (as described above in this section). When shorter than the  
667 exon length, coordinates were extended to match the total exon length. Exon sequences including 10  
668 consecutive Ns (introduced during the *w2rap* assembly process) were excluded from this analysis to avoid  
669 artificial sequence frameshifts. The remaining exonic sequences of all species were then aligned to the *H.*  
670 *melpomene* reference genome using MAFFT v7.407 (Katoh and Standley 2013), with default parameters  
671 and allowing reverse complementing of sequences when necessary. Bases before the start and after the  
672 end of the *H. melpomene* reference sequence were removed from the alignment since these could have  
673 been erroneously included when extending sequences to match the total exon length (see above). Also,  
674 alignments including frameshift mutations (determined based on the *H. melpomene* sequence) were  
675 excluded. We then calculated the ratio of non-synonymous versus synonymous changes (dN/dS) for each  
676 pairwise comparison between exon copies detected in the reference-guided assemblies and the reference  
677 *H. melpomene* sequence, using Li's (1993) method implemented in the 'seqinr' package in R. Finally, we  
678 checked for the presence of stop codons using a custom script.

679

### 680 ***Detection of inversions in the w2rap assemblies***

681 In order to detect potential inversions in relation to the reference genomes, we mapped the *w2rap*  
682 scaffolds (after filtering with HaploMerger2; see above) onto the reference genomes. Scaffolds of at least  
683 5 kb were mapped to the *H. m. melpomene* and the *H. erato demophoon* reference genomes using  
684 minimap2 (Li 2018) with default settings. Only primary alignments (tp:A:P), at least 1 kb long, with  
685 mapping quality  $\geq 60$  and with less than 25% approximate per-base sequence divergence (dv) to the

686 reference were kept. Mappings of scaffolds spanning inversion breakpoints in the reference genome  
687 should result in split alignments to different strands. We thus considered scaffolds as potentially  
688 informative for inversions if they had at least two alignments to the same chromosome (split-alignments)  
689 and at least one alignment to each strand as potentially informative for inversions. Same-scaffold  
690 alignments mapping to the same strand, partially overlapping or not more than 50 kb apart were  
691 concatenated. If less than 20% of the length of the scaffold aligned to the reference, the scaffold was  
692 excluded. Furthermore, any scaffolds for which both forward and reverse alignments to the reference i)  
693 come from overlapping scaffold regions (overlap greater than 5 kb), ii) overlap in the reference by more  
694 than 5 kb or iii) in which the alignment in one strand is completely within the alignment to the other  
695 strand, were removed as these likely represent spurious alignments, perhaps due to repeats. Candidate  
696 inversions less than 50 kb from scaffold boundaries within chromosomes of the reference genome were  
697 also excluded. Finally, we considered any two informative scaffolds to support the same candidate  
698 inversion if they overlapped by at least 75% of the maximum length of the two. We also mapped the two  
699 reference genomes against each other (and also the *H. erato lativitta* onto both) using minimap2 and  
700 inferred candidate inversions by looking for alignments, within a scaffold, to the reverse strand. Only  
701 alignments with a MQ  $\geq$  10 and to the same chromosome in the reference were considered. Entire  
702 scaffolds aligning to the reverse strand are possibly mis-oriented and were not considered to be  
703 inversions.

704 For each candidate inversion we made sequence alignments for a subset of species (*H. melpomene*, *H.*  
705 *numata*, *H. doris*, *H. burneyi*, *H. erato* and *H. hecalesia*, using *Eueides tales* as an outgroup) based on the  
706 original *w2rap* sequencing data mapped to both *H. melpomene* and *H. erato* reference genomes. We then  
707 estimated maximum-likelihood (ML) trees for these candidate regions using IQ-TREE v1.6.10 (Nguyen  
708 et al. 2015). Model selection was performed using ModelFinder (Kalyaanamoorthy et al. 2017) and  
709 branch support was assessed with 1000 ultra-fast bootstraps (Hoang et al. 2018), as implemented in IQ-  
710 TREE.



711 We used the Patterson's  $D$  statistic (Green et al. 2010; Durand et al. 2011) to test i) which branching  
712 pattern best describes the relationships between *H. doris*, *H. burney*, the *erato/sara* and the  
713 *melpomene/silvaniform* groups and ii) whether the alternative clustering of *H. doris* and *H. burney* with  
714 either of the two groups (both patterns were observed in the inversions) could be explained by  
715 introgression. We used the ABBABABAwindows.py script (available from  
716 [github.com/simonhmartin/genomics\\_general](https://github.com/simonhmartin/genomics_general)) to estimate the  $D$  statistic in non-overlapping windows of 1  
717 Mb, discarding all windows with fewer than 100 informative sites. The mean and variance of the  $D$   
718 *statistic* were calculated using a 1-Mb block jackknifing approach, allowing to test whether  $D$  differed  
719 significantly from zero. We have also used the internal branch length based approach QuIBL (Edelman et  
720 al. 2019), which uses the distribution of internal branch lengths and calculates the likelihood that the  
721 triplet topologies discordant from the species tree are due to introgression rather than ILS alone. For this  
722 analysis, we sampled 10 kb windows along the genome (50 kb apart) and for each we estimated  
723 maximum-likelihood trees using the phylml\_sliding\_windows.py (available from  
724 [github.com/simonhmartin/genomics\\_general](https://github.com/simonhmartin/genomics_general)). Only alignments with less than 5% of the sites genotyped  
725 were discarded. We then ran QuIBL on the filtered dataset with default parameters and adjusting the  
726 number of steps to 50. In both Patterson's  $D$  and QuIBL analyses, *Eueides tales* was used as outgroup.  
727 In order to detect local signals of introgression we also calculated the  $f_{dM}$  statistic (Malinsky et al. 2015),  
728 which, like the  $f_d$  statistic (Martin et al. 2015), checks for imbalance in the number of shared variants  
729 between the inner outgroup population and one of two ingroup populations, and was developed  
730 specifically to investigate introgression of small genomic regions. Unlike the  $f_d$  statistic, it simultaneously  
731 tests for an excess of shared variation between the inner outgroup population and either ingroup  
732 population, at each genomic window. Again, we used the ABBABABAwindows.py script (available from  
733 [github.com/simonhmartin/genomics\\_general](https://github.com/simonhmartin/genomics_general)) to estimate the  $f_{dM}$  in non-overlapping windows of 100 kb,  
734 discarding all windows with fewer than 100 informative sites. Because a local excess of derived alleles  
735 could also be explained by retention of ancestral polymorphism (incomplete lineage sorting - ILS), we

736 calculated the divergence ( $D_{XY}$ ) between both *H. doris* and *H. burneyi* to *H. erato*, normalized by  
737 divergence to *H. melpomene* (i.e. Relative Node Depth, RND), to control for variation in substitution rate  
738 across the genome.  $D_{XY}$  was calculated in 100 kb non-overlapping windows using the popgenWindows.py  
739 script (available from [github.com/simonhmartin/genomics\\_general](https://github.com/simonhmartin/genomics_general)). Finally, we also used QuIBL to  
740 estimate the probability that gene trees within the chromosome 13 inversion were generated by  
741 introgression.

742

### 743 *Gene expression analyses*

744 Ovaries were dissected from adult females of *H. melpomene rosina* and *H. pardalinus butleri* at two  
745 weeks post-eclosion, divided into developmental stages, and stored in RNALater. Ovaries were blotted  
746 dry with kimWipes to remove excess RNALater solution. Tissue was then transferred to TRIZOL and  
747 homogenized with the PRO200 tissue homogenizer (PRO Scientific). RNA was extracted with the Direct-  
748 zol RNA miniprep kit (Zymo R2051). mRNA libraries were prepared by the Harvard University Bauer  
749 Core with the KAPA mRNA HyperPrep kit, with mean fragment insert sizes of 200-300bp. mRNA was  
750 sequenced with the NovaSeq S2, producing an average of 49 million paired-end, 50 bp reads.

751 RNASeq reads were mapped to the *H. melpomene* v2.5 transcriptome (Pinharanda et al. 2019) using  
752 kallisto (Bray et al. 2016). Analysis was carried out in R using the Sleuth package (Pimentel et al. 2017).  
753 Significant differences in expression levels between *H. melpomene* and *H. pardalinus* were assessed with  
754 a likelihood ratio test, comparing expression as a function of developmental stage to expression as a  
755 function of developmental stage + species identity.

756

### 757 **Data access**

758 On publication, the reference-guided assemblies and gene annotations generated in this study will have  
759 been made available in Zenodo and all custom scripts used in this study will be made available on the  
760 GitHub repository <https://github.com/FernandoSeixas/HeliconiusReferenceGuidedAssemblies>.

761

## 762 **Competing interest statement**

763 The authors declare no competing interests.

764

## 765 **Acknowledgements**

766 We thank the Harvard FAS Research Computing team for their support, A. Shumate for her guidance  
767 using the Liftoff software, J. Davey and D. Ray for their valuable inputs to our thinking around genome  
768 structural variation, and N. Rosser for the helpful discussions on *Heliconius*. This project was funded by  
769 a SPARC Grant from the Broad Institute of Harvard and MIT and funds from Harvard University

770

## 771 **Bibliography**

- 772 Alonge M, Soyk S, Ramakrishnan S, Wang X, Goodwin S, Sedlazeck FJ, Lippman ZB, Schatz MC. 2019.  
773 RaGOO: fast and accurate reference-guided scaffolding of draft genomes. *Genome Biol* **20**: 224.
- 774 Benevenuto J, Ferrão LF V., Amadeu RR, Munoz P. 2019. How can a high-quality genome assembly  
775 help plant breeders? *Gigascience* **8**: 1–4.
- 776 Bosi E, Donati B, Galardini M, Brunetti S, Sagot M-F, Lió P, Crescenzi P, Fani R, Fondi M. 2015.  
777 MeDuSa: a multi-draft based scaffolder. *Bioinformatics* **31**: 2443–2451.
- 778 Bourque G, Burns KH, Gehring M, Gorbunova V, Seluanov A, Hammell M, Imbeault M, Izsvák Z, Levin  
779 HL, Macfarlan TS, et al. 2018. Ten things you should know about transposable elements. *Genome*  
780 *Biol* **19**: 199.
- 781 Bray NL, Pimentel H, Melsted P, Pachter L. 2016. Near-optimal probabilistic RNA-seq quantification.  
782 *Nat Biotechnol* **34**: 525–527.
- 783 Briscoe AD, Macias-Muñoz A, Kozak KM, Walters JR, Yuan F, Jamie GA, Martin SH, Dasmahapatra  
784 KK, Ferguson LC, Mallet J, et al. 2013. Female Behaviour Drives Expression and Evolution of  
785 Gustatory Receptors in Butterflies. *PLoS Genet* **9**: e1003620.
- 786 Cabanettes F, Klopp C. 2018. D-GENIES: dot plot large genomes in an interactive, efficient and simple

- 787 way. *PeerJ* **6**: e4958.
- 788 Christmas MJ, Wallberg A, Bunikis I, Olsson A, Wallerman O, Webster MT. 2019. Chromosomal  
789 inversions associated with environmental adaptation in honeybees. *Mol Ecol* **28**: 1358–1374.
- 790 Clavijo B, Accinelli GG, Wright J, Heavens D, Barr K, Yanes L, Di-Palma F. 2017. W2RAP: a pipeline  
791 for high quality, robust assemblies of large complex genomes from short read data. *bioRxiv*.
- 792 Coyne JA. 2018. “Two Rules of Speciation” revisited. *Mol Ecol* **27**: 3749–3752.
- 793 Coyne JA, Orr AH. 1989. Two rules of speciation. In *Speciation and its Consequences* (eds. D. Otte and  
794 J.A. Endler), pp. 180–207, Sinauer Associates, Sunderland, MA.
- 795 Davey JW, Barker SL, Rastas PM, Pinharanda A, Martin SH, Durbin R, McMillan WO, Merrill RM,  
796 Jiggins CD. 2017. No evidence for maintenance of a sympatric *Heliconius* species barrier by  
797 chromosomal inversions. *Evol Lett* **1**: 138–154.
- 798 DePristo MA, Banks E, Poplin R, Garimella K V, Maguire JR, Hartl C, Philippakis AA, del Angel G,  
799 Rivas MA, Hanna M, et al. 2011. A framework for variation discovery and genotyping using next-  
800 generation DNA sequencing data. *Nat Genet* **43**: 491–8.
- 801 Deschamps S, Zhang Y, Llaca V, Ye L, Sanyal A, King M, May G, Lin H. 2018. A chromosome-scale  
802 assembly of the sorghum genome using nanopore sequencing and optical mapping. *Nat Commun* **9**:  
803 4844.
- 804 Durand EY, Patterson N, Reich D, Slatkin M. 2011. Testing for Ancient Admixture between Closely  
805 Related Populations. *Mol Biol Evol* **28**: 2239–2252.
- 806 Edelman NB, Frandsen PB, Miyagi M, Clavijo B, Davey JW, Dikow RB, García-Accinelli G, Van  
807 Belleghem SM, Patterson N, Neafsey DE, et al. 2019. Genomic architecture and introgression shape  
808 a butterfly radiation. *Science* **366**: 594–599.
- 809 Ellegren H, Smeds L, Burri R, Olason PI, Backström N, Kawakami T, Künstner A, Mäkinen H,  
810 Nadachowska-Brzyska K, Qvarnström A, et al. 2012. The genomic landscape of species divergence  
811 in *Ficedula* flycatchers. *Nature* **491**: 756–760.
- 812 Faria R, Chaube P, Morales HE, Larsson T, Lemmon AR, Lemmon EM, Rafajlović M, Panova M,  
813 Ravinet M, Johannesson K, et al. 2019. Multiple chromosomal rearrangements in a hybrid zone  
814 between *Littorina saxatilis* ecotypes. *Mol Ecol* **28**: 1375–1393.
- 815 Feulner PGD, De-Kayne R. 2017. Genome evolution, structural rearrangements and speciation. *J Evol*  
816 *Biol* **30**: 1488–1490.
- 817 Fontaine MC, Pease JB, Steele A, Waterhouse RM, Neafsey DE, Sharakhov I V, Jiang X, Hall AB,  
818 Catteruccia F, Kakani E, et al. 2015. Extensive introgression in a malaria vector species complex  
819 revealed by phylogenomics. *Science* **347**: 1258524.
- 820 Ghurye J, Pop M. 2019. Modern technologies and algorithms for scaffolding assembled genomes. *PLOS*  
821 *Comput Biol* **15**: e1006994.
- 822 Gopalakrishnan S, Samaniego Castruita JA, Sinding M-HS, Kuderna LFK, Räikkönen J, Petersen B,  
823 Sicheritz-Ponten T, Larson G, Orlando L, Marques-Bonet T, et al. 2017. The wolf reference genome  
824 sequence (*Canis lupus lupus*) and its implications for *Canis* spp. population genomics. *BMC*  
825 *Genomics* **18**: 495.
- 826 Green RE, Krause J, Briggs AW, Maricic T, Stenzel U, Kircher M, Patterson N, Li H, Zhai W, Fritz MH-  
827 Y, et al. 2010. A draft sequence of the Neandertal genome. *Science* **328**: 710–22.
- 828 Gurevich A, Saveliev V, Vyahhi N, Tesler G. 2013. QUAST: quality assessment tool for genome  
829 assemblies. *Bioinformatics* **29**: 1072–5.

- 830 Hoang DT, Chernomor O, von Haeseler A, Minh BQ, Vinh LS. 2018. UFBoot2: Improving the Ultrafast  
831 Bootstrap Approximation. *Mol Biol Evol* **35**: 518–522.
- 832 Huang S, Kang M, Xu A. 2017. HaploMerger2: rebuilding both haploid sub-assemblies from high-  
833 heterozygosity diploid genome assembly. *Bioinformatics* **33**: 2577–2579.
- 834 Iskow RC, Gokcumen O, Lee C. 2012. Exploring the role of copy number variants in human adaptation.  
835 *Trends Genet* **28**: 245–257.
- 836 Jackman SD, Vandervalk BP, Mohamadi H, Chu J, Yeo S, Hammond SA, Jahesh G, Khan H, Coombe L,  
837 Warren RL, et al. 2017. ABySS 2.0: resource-efficient assembly of large genomes using a Bloom  
838 filter. *Genome Res* **27**: 768–777.
- 839 Jay P, Whibley A, Frézal L, Rodríguez de Cara MÁ, Nowell RW, Mallet J, Dasmahapatra KK, Joron M.  
840 2018. Supergene Evolution Triggered by the Introgression of a Chromosomal Inversion. *Curr Biol*  
841 **28**: 1839–1845.
- 842 Jiggins CD, Mavarez J, Beltrán M, McMillan WO, Johnston JS, Bermingham E. 2005. A genetic linkage  
843 map of the mimetic butterfly *Heliconius melpomene*. *Genetics* **171**: 557–570.
- 844 Joron M, Frezal L, Jones RT, Chamberlain NL, Lee SF, Haag CR, Whibley A, Becuwe M, Baxter SW,  
845 Ferguson L, et al. 2011. Chromosomal rearrangements maintain a polymorphic supergene  
846 controlling butterfly mimicry. *Nature* **477**: 203–206.
- 847 Kalyaanamoorthy S, Minh BQ, Wong TKF, von Haeseler A, Jermini LS. 2017. ModelFinder: fast model  
848 selection for accurate phylogenetic estimates. *Nat Methods* **14**: 587–589.
- 849 Katoh K, Standley DM. 2013. MAFFT Multiple Sequence Alignment Software Version 7: Improvements  
850 in Performance and Usability. *Mol Biol Evol* **30**: 772–780.
- 851 Kozak KM, McMillan O, Joron M, Jiggins CD. 2018. Genome-wide admixture is common across the  
852 *Heliconius* radiation. *bioRxiv* doi: 10.1101/414201.
- 853 Kozak KM, Wahlberg N, Neild AFE, Dasmahapatra KK, Mallet J, Jiggins CD. 2015. Multilocus Species  
854 Trees Show the Recent Adaptive Radiation of the Mimetic *Heliconius* Butterflies. *Syst Biol* **64**: 505–  
855 524.
- 856 Leffler EM, Band G, Busby GBJ, Kivinen K, Le QS, Clarke GM, Bojang KA, Conway DJ, Jallow M,  
857 Sisay-Joof F, et al. 2017. Resistance to malaria through structural variation of red blood cell  
858 invasion receptors. *Science* **356**: 1140–1152.
- 859 Lewis JJ, Reed RD. 2019. Genome-Wide Regulatory Adaptation Shapes Population-Level Genomic  
860 Landscapes in *Heliconius*. *Mol Biol Evol* **36**: 159–173.
- 861 Lewis JJ, van der Burg KRL, Mazo-Vargas A, Reed RD. 2016. ChIP-Seq-Annotated *Heliconius erato*  
862 Genome Highlights Patterns of cis-Regulatory Evolution in Lepidoptera. *Cell Rep* **16**: 2855–2863.
- 863 Li H. 2011. A statistical framework for SNP calling, mutation discovery, association mapping and  
864 population genetical parameter estimation from sequencing data. *Bioinformatics* **27**: 2987–2993.
- 865 Li H. 2013. *Aligning sequence reads, clone sequences and assembly contigs with BWA-MEM*. arXiv  
866 Prepr. arXiv **0**: 3.
- 867 Li H. 2018. Minimap2: pairwise alignment for nucleotide sequences. *Bioinformatics* **34**: 3094–3100.
- 868 Li H, Handsaker B, Wysoker A, Fennell T, Ruan J, Homer N, Marth G, Abecasis G, Durbin R. 2009. The  
869 Sequence Alignment/Map format and SAMtools. *Bioinformatics* **25**: 2078–2079.
- 870 Li W-H. 1993. Unbiased estimation of the rates of synonymous and nonsynonymous substitution. *J Mol*  
871 *Evol* **36**: 96–99.

- 872 Li X, Zhu C, Lin Z, Wu Y, Zhang D, Bai G, Song W, Ma J, Muehlbauer GJ, Scanlon MJ, et al. 2011.  
873 Chromosome Size in Diploid Eukaryotic Species Centers on the Average Length with a Conserved  
874 Boundary. *Mol Biol Evol* **28**: 1901–1911.
- 875 Logsdon GA, Vollger MR, Eichler EE. 2020. Long-read human genome sequencing and its applications.  
876 *Nat Rev Genet* **21**: 597–614.
- 877 Love RR, Weisenfeld NI, Jaffe DB, Besansky NJ, Neafsey DE. 2016. Evaluation of DISCOVAR de novo  
878 using a mosquito sample for cost-effective short-read genome assembly. *BMC Genomics* **17**: 187.
- 879 Lucas ER, Miles A, Harding NJ, Clarkson CS, Lawniczak MKN, Kwiatkowski DP, Weetman D,  
880 Donnelly MJ. 2019. Whole-genome sequencing reveals high complexity of copy number variation  
881 at insecticide resistance loci in malaria mosquitoes. *Genome Res* **29**: 1250–1261.
- 882 Malinsky M, Challis RJ, Tyers AM, Schiffels S, Terai Y, Ngatunga BP, Miska EA, Durbin R, Genner  
883 MJ, Turner GF. 2015. Genomic islands of speciation separate cichlid ecomorphs in an East African  
884 crater lake. *Science* **350**: 1493–1498.
- 885 Mallet J, Beltrán M, Neukirchen W, Linares M. 2007. Natural hybridization in heliconiine butterflies: the  
886 species boundary as a continuum. *BMC Evol Biol* **7**: 28.
- 887 Markelz RJC, Covington MF, Brock MT, Devisetty UK, Kliebenstein DJ, Weinig C, Maloof JN. 2017.  
888 Using RNA-Seq for genomic scaffold placement, correcting assemblies, and genetic map creation in  
889 a common *Brassica rapa* mapping population. *G3 Genes, Genomes, Genet* **7**: 2259–2270.
- 890 Martin M. 2011. Cutadapt removes adapter sequences from high-throughput sequencing reads.  
891 *EMBnet.journal* **17**: 10.
- 892 Martin SH, Davey JW, Jiggins CD. 2015. Evaluating the Use of ABBA–BABA Statistics to Locate  
893 Introgressed Loci. *Mol Biol Evol* **32**: 244–257.
- 894 Martin SH, Davey JW, Salazar C, Jiggins CD. 2019. Recombination rate variation shapes barriers to  
895 introgression across butterfly genomes. *PLOS Biol* **17**: e2006288.
- 896 Masly JP, Presgraves DC. 2007. High-Resolution Genome-Wide Dissection of the Two Rules of  
897 Speciation in *Drosophila*. *PLoS Biol* **5**: e243.
- 898 Massardo D, VanKuren NW, Nallu S, Ramos RR, Ribeiro PG, Silva-Brandão KL, Brandão MM, Lion  
899 MB, Freitas AVL, Cardoso MZ, et al. 2020. The roles of hybridization and habitat fragmentation in  
900 the evolution of Brazil’s enigmatic longwing butterflies, *Heliconius nattereri* and *H. hermathena*.  
901 *BMC Biol* **18**: 84.
- 902 McKenna A, Hanna M, Banks E, Sivachenko A, Cibulskis K, Kernytsky A, Garimella K, Altshuler D,  
903 Gabriel S, Daly M, et al. 2010. The genome analysis toolkit: A MapReduce framework for  
904 analyzing next-generation DNA sequencing data. *Genome Res* **20**: 1297–1303.
- 905 Meier JI, Salazar PA, Ku M, Davies RW, Dréau A, Aldás I, Power OB, Nadeau NJ, Bridle JR, Rolian C,  
906 et al. 2020. Haplotype tagging reveals parallel formation of hybrid races in two butterfly species.  
907 *bioRxiv* doi: 10.1101/2020.05.25.113688.
- 908 Morgulis A, Michael Gertz E, Schä AA, Agarwala R. 2006. WindowMasker: window-based masker for  
909 sequenced genomes. **22**: 134–141.
- 910 Nguyen L-T, Schmidt HA, von Haeseler A, Minh BQ. 2015. IQ-TREE: A Fast and Effective Stochastic  
911 Algorithm for Estimating Maximum-Likelihood Phylogenies. *Mol Biol Evol* **32**: 268–274.
- 912 Noor MAF, Grams KL, Bertucci LA, Reiland J. 2001. Chromosomal inversions and the reproductive  
913 isolation of species. *Proc Natl Acad Sci* **98**: 12084–12088.
- 914 Pimentel H, Bray NL, Puente S, Melsted P, Pachter L. 2017. Differential analysis of RNA-seq

- 915 incorporating quantification uncertainty. *Nat Methods* **14**: 687–690.
- 916 Pinharanda A, Martin SH, Barker SL, Davey JW, Jiggins CD. 2017. The comparative landscape of  
917 duplications in *Heliconius melpomene* and *Heliconius cydno*. *Heredity* **118**: 78–87.
- 918 Pinharanda A, Rousselle M, Martin SH, Hanly JJ, Davey JW, Kumar S, Galtier N, Jiggins CD. 2019.  
919 Sexually dimorphic gene expression and transcriptome evolution provide mixed evidence for a fast-  
920 Z effect in *Heliconius*. *J Evol Biol* **32**: 194–204.
- 921 Prowell PD. 1998. Sex linkage and speciation in Lepidoptera. In *Endless Forms. Species and Speciation*  
922 (eds. D.J. Howard and S.H. Berlocher), pp. 309–319, Oxford University Press, New York.
- 923 Prüfer K, Stenzel U, Hofreiter M, Pääbo S, Kelso J, Green RE. 2010. Computational challenges in the  
924 analysis of ancient DNA. *Genome Biol* **11**: R47.
- 925 Prunier J, Caron S, Lamothe M, Blais S, Bousquet J, Isabel N, MacKay J. 2017. Gene copy number  
926 variations in adaptive evolution: The genomic distribution of gene copy number variations revealed  
927 by genetic mapping and their adaptive role in an undomesticated species, white spruce (*Picea*  
928 *glauca*). *Mol Ecol* **26**: 5989–6001.
- 929 Ray DA, Grimshaw JR, Halsey MK, Korstian JM, Osmanski AB, Sullivan KAM, Wolf KA, Reddy H,  
930 Foley N, Stevens RD, et al. 2019. Simultaneous TE Analysis of 19 Heliconiine Butterflies Yields  
931 Novel Insights into Rapid TE-Based Genome Diversification and Multiple SINE Births and Deaths.  
932 *Genome Biol Evol* **11**: 2162–2177.
- 933 Rice ES, Green RE. 2019. New Approaches for Genome Assembly and Scaffolding. *Annu Rev Anim*  
934 *Biosci* **7**: 17–40.
- 935 Rinker DC, Specian NK, Zhao S, Gibbons JG. 2019. Polar bear evolution is marked by rapid changes in  
936 gene copy number in response to dietary shift. *Proc Natl Acad Sci* **116**: 13446–13451.
- 937 Rosser N, Queste LM, Cama B, Edelman NB, Mann F, Mori Pezo R, Morris J, Segami C, Velado P,  
938 Schulz S, et al. 2019. Geographic contrasts between pre- and postzygotic barriers are consistent with  
939 reinforcement in *Heliconius* butterflies. *Evolution* **73**: 1821–1838.
- 940 Schumer M, Xu C, Powell DL, Durvasula A, Skov L, Holland C, Blazier JC, Sankararaman S, Andolfatto  
941 P, Rosenthal GG, et al. 2018. Natural selection interacts with recombination to shape the evolution  
942 of hybrid genomes. *Science* **3684**: eaar3684.
- 943 Seixas FA, Boursot P, Melo-Ferreira J. 2018. The genomic impact of historical hybridization with  
944 massive mitochondrial DNA introgression. *Genome Biol* **19**: 91.
- 945 Shumate A, Salzberg SL. 2020. Liftoff: an accurate gene annotation mapping tool. *bioRxiv* doi:  
946 2020.06.24.169680.
- 947 Simão FA, Waterhouse R, Ioannidis P, Kriventseva E V., Zdobnov EM. 2015. BUSCO: Assessing  
948 genome assembly and annotation completeness with single-copy orthologs. *Bioinformatics* **31**:  
949 3210–3212.
- 950 Tarasov A, Vilella AJ, Cuppen E, Nijman IJ, Prins P. 2015. Genome analysis Sambamba : fast processing  
951 of NGS alignment formats. *Bioinformatics* **31**: 2032–2034.
- 952 The *Heliconius* Genome Consortium. 2012. Butterfly genome reveals promiscuous exchange of mimicry  
953 adaptations among species. *Nature* **487**: 94–98.
- 954 Tobler A, Kapan D, Flanagan NS, Gonzalez C, Peterson E, Jiggins CD, Johnstson JS, Heckel DG,  
955 McMillan WO. 2005. First-generation linkage map of the warningly colored butterfly *Heliconius*  
956 *erato*. *Heredity* **94**: 408–417.
- 957 Todesco M, Owens GL, Bercovich N, Légaré JS, Soudi S, Burge DO, Huang K, Ostevik KL, Drummond

- 958 EBM, Imerovski I, et al. 2020. Massive haplotypes underlie ecotypic differentiation in sunflowers.  
959 *Nature*.
- 960 Van Belleghem SM, Rastas P, Papanicolaou A, Martin SH, Arias CF, Supple MA, Hanly JJ, Mallet J,  
961 Lewis JJ, Hines HM, et al. 2017. Complex modular architecture around a simple toolkit of wing  
962 pattern genes. *Nat Ecol Evol* **1**: 0052.
- 963 Wei S, Yang Y, Yin T. 2020. The chromosome-scale assembly of the willow genome provides insight  
964 into Salicaceae genome evolution. *Hortic Res* **7**: 45.
- 965 Weisenfeld NI, Yin S, Sharpe T, Lau B, Hegarty R, Holmes L, Sogoloff B, Tabbaa D, Williams L, Russ  
966 C, et al. 2014. Comprehensive variation discovery in single human genomes. *Nat Genet* **46**: 1350–  
967 1355.
- 968 Wellenreuther M, Bernatchez L. 2018. Eco-Evolutionary Genomics of Chromosomal Inversions. *Trends*  
969 *Ecol Evol* **33**: 427–440.
- 970 Wellenreuther M, Mérot C, Berdan E, Bernatchez L. 2019. Going beyond SNPs: The role of structural  
971 genomic variants in adaptive evolution and species diversification. *Mol Ecol* **28**: 1203–1209.
- 972 Yang J, Wan W, Xie M, Mao J, Dong Z, Lu S, He J, Xie F, Liu G, Dai X, et al. 2020. Chromosome-level  
973 reference genome assembly and gene editing of the dead-leaf butterfly *Kallima inachus*. *Mol Ecol*  
974 *Resour* **20**: 1080–1092.
- 975 Yu A, Li F, Xu W, Wang Z, Sun C, Han B, Wang Y, Wang B, Cheng X, Liu A. 2019. Application of a  
976 high-resolution genetic map for chromosome-scale genome assembly and fine QTLs mapping of  
977 seed size and weight traits in castor bean. *Sci Rep* **9**: 1–11.
- 978 Zuellig MP, Sweigart AL. 2018. Gene duplicates cause hybrid lethality between sympatric species of  
979 *Mimulus*. *PLoS Genet* **14**: 1–20.
- 980
